# Supplementary material
Source: publisher figshare collection journal article supplement (https://acs.figshare.com/ndownloader/files/5691675)
Supplement: Supplementary file 1 [file 5691675]

# ic0106569.cif

data_kp18s 

_audit_creation_method            SHELXL-97 
_chemical_name_systematic 
; 
  Lithium Neo-pentoxide 
; 
_chemical_name_common             [LiONep]8 
_chemical_melting_point           ? 
_chemical_formula_moiety          ? 
_chemical_formula_sum 
  'C40 H88 Li8 O8' 
_chemical_formula_weight          752.62 

loop_ 
  _atom_type_symbol 
  _atom_type_description 
  _atom_type_scat_dispersion_real 
  _atom_type_scat_dispersion_imag 
  _atom_type_scat_source 
  'O'  'O'   0.0106   0.0060 
  'International Tables Vol C Tables 4.2.6.8 and 6.1.1.4' 
  'C'  'C'   0.0033   0.0016 
  'International Tables Vol C Tables 4.2.6.8 and 6.1.1.4' 
  'Li'  'Li'  -0.0003   0.0001 
  'International Tables Vol C Tables 4.2.6.8 and 6.1.1.4' 
  'H'  'H'   0.0000   0.0000 
  'International Tables Vol C Tables 4.2.6.8 and 6.1.1.4' 

_symmetry_cell_setting            Triclinic 
_symmetry_space_group_name_H-M    P-1 

loop_ 
  _symmetry_equiv_pos_as_xyz 
  'x, y, z' 
  '-x, -y, -z' 

_cell_length_a                    10.622(2) 
_cell_length_b                    12.417(3) 
_cell_length_c                    20.960(4) 
_cell_angle_alpha                 86.078(3) 
_cell_angle_beta                  87.948(3) 
_cell_angle_gamma                 74.079(3) 
_cell_volume                      2651.7(10) 
_cell_formula_units_Z             2 
_cell_measurement_temperature     168(2) 
_cell_measurement_reflns_used     ? 
_cell_measurement_theta_min       ? 
_cell_measurement_theta_max       ? 

_exptl_crystal_description        ? 
_exptl_crystal_colour             ? 
_exptl_crystal_size_max           ? 
_exptl_crystal_size_mid           ? 
_exptl_crystal_size_min           ? 
_exptl_crystal_density_meas       ? 
_exptl_crystal_density_diffrn     0.943 
_exptl_crystal_density_method     'not measured' 
_exptl_crystal_F_000              832 
_exptl_absorpt_coefficient_mu     0.060 
_exptl_absorpt_correction_type    SADABS 
_exptl_absorpt_correction_T_min   ? 
_exptl_absorpt_correction_T_max   ? 
_exptl_absorpt_process_details    ? 

_exptl_special_details 
; 
  ? 
; 

_diffrn_ambient_temperature       168(2) 
_diffrn_radiation_wavelength      0.71073 
_diffrn_radiation_type            MoK\a 
_diffrn_radiation_source          'fine-focus sealed tube' 
_diffrn_radiation_monochromator   graphite 
_diffrn_measurement_device_type   'CCD area detector' 
_diffrn_measurement_method        'phi and omega scans' 
_diffrn_detector_area_resol_mean  ? 
_diffrn_standards_number          ? 
_diffrn_standards_interval_count  ? 
_diffrn_standards_interval_time   ? 
_diffrn_standards_decay_%         ? 
_diffrn_reflns_number             12545 
_diffrn_reflns_av_R_equivalents   0.0304 
_diffrn_reflns_av_sigmaI/netI     0.0710 
_diffrn_reflns_limit_h_min        -11 
_diffrn_reflns_limit_h_max        11 
_diffrn_reflns_limit_k_min        -10 
_diffrn_reflns_limit_k_max        13 
_diffrn_reflns_limit_l_min        -23 
_diffrn_reflns_limit_l_max        22 
_diffrn_reflns_theta_min          1.71 
_diffrn_reflns_theta_max          23.29 
_reflns_number_total              7602 
_reflns_number_gt                 4381 
_reflns_threshold_expression      >2sigma(I) 

_computing_data_collection        'Bruker SMART' 
_computing_cell_refinement        'Bruker SMART' 
_computing_data_reduction         'Bruker SHELXTL' 
_computing_structure_solution     'SHELXS-97 (Sheldrick, 1990)' 
_computing_structure_refinement   'SHELXL-97 (Sheldrick, 1997)' 
_computing_molecular_graphics     'Bruker SHELXTL' 
_computing_publication_material   'Bruker SHELXTL' 

_refine_special_details 
; 
  Refinement of F^2^ against ALL reflections.  The weighted R-factor wR and 
  goodness of fit S are based on F^2^, conventional R-factors R are based 
  on F, with F set to zero for negative F^2^. The threshold expression of 
  F^2^ > 2sigma(F^2^) is used only for calculating R-factors(gt) etc. and is 
  not relevant to the choice of reflections for refinement.  R-factors based 
  on F^2^ are statistically about twice as large as those based on F, and R- 
  factors based on ALL data will be even larger. 
; 

_refine_ls_structure_factor_coef  Fsqd 
_refine_ls_matrix_type            full 
_refine_ls_weighting_scheme       calc 
_refine_ls_weighting_details 
  'calc w=1/[\s^2^(Fo^2^)+(0.0796P)^2^+0.0000P] where P=(Fo^2^+2Fc^2^)/3' 
_atom_sites_solution_primary      direct 
_atom_sites_solution_secondary    difmap 
_atom_sites_solution_hydrogens    geom 
_refine_ls_hydrogen_treatment     mixed 
_refine_ls_extinction_method      none 
_refine_ls_extinction_coef        ? 
_refine_ls_number_reflns          7602 
_refine_ls_number_parameters      505 
_refine_ls_number_restraints      0 
_refine_ls_R_factor_all           0.1007 
_refine_ls_R_factor_gt            0.0520 
_refine_ls_wR_factor_ref          0.1478 
_refine_ls_wR_factor_gt           0.1271 
_refine_ls_goodness_of_fit_ref    0.921 
_refine_ls_restrained_S_all       0.921 
_refine_ls_shift/su_max           0.000 
_refine_ls_shift/su_mean          0.000 

loop_ 
  _atom_site_label 
  _atom_site_type_symbol 
  _atom_site_fract_x 
  _atom_site_fract_y 
  _atom_site_fract_z 
  _atom_site_U_iso_or_equiv 
  _atom_site_adp_type 
  _atom_site_occupancy 
  _atom_site_symmetry_multiplicity 
  _atom_site_calc_flag 
  _atom_site_refinement_flags 
  _atom_site_disorder_assembly 
  _atom_site_disorder_group 
Li1 Li 0.7332(4) 0.2851(4) 0.3729(2) 0.0431(11) Uani 1 1 d . . . 
Li2 Li 0.8939(5) 0.3874(4) 0.3448(2) 0.0455(12) Uani 1 1 d . . . 
Li3 Li 0.7405(4) 0.4435(3) 0.2562(2) 0.0421(11) Uani 1 1 d . . . 
Li4 Li 0.8965(4) 0.1578(4) 0.3109(2) 0.0429(11) Uani 1 1 d . . . 
Li5 Li 0.6628(4) 0.2428(3) 0.2293(2) 0.0402(11) Uani 1 1 d . . . 
Li6 Li 0.9862(4) 0.2923(3) 0.2055(2) 0.0414(11) Uani 1 1 d . . . 
Li7 Li 0.9206(4) 0.1405(3) 0.15997(19) 0.0401(11) Uani 1 1 d . . . 
Li8 Li 0.7538(4) 0.3082(4) 0.1269(2) 0.0432(11) Uani 1 1 d . . . 
O1 O 0.70951(17) 0.43607(13) 0.34539(8) 0.0430(5) Uani 1 1 d . . . 
O2 O 0.91520(17) 0.24177(14) 0.38085(7) 0.0416(5) Uani 1 1 d . . . 
O3 O 0.92628(16) 0.41282(13) 0.25680(7) 0.0369(4) Uani 1 1 d . . . 
O4 O 0.70779(15) 0.18855(13) 0.31288(7) 0.0351(4) Uani 1 1 d . . . 
O5 O 0.65600(16) 0.39265(13) 0.19333(7) 0.0367(4) Uani 1 1 d . . . 
O6 O 1.00028(16) 0.14118(12) 0.23810(7) 0.0354(4) Uani 1 1 d . . . 
O7 O 0.93540(17) 0.27851(14) 0.12079(7) 0.0417(5) Uani 1 1 d . . . 
O8 O 0.73771(16) 0.16585(13) 0.15621(8) 0.0410(5) Uani 1 1 d . . . 
C1 C 0.5874(3) 0.5052(3) 0.36387(16) 0.0670(9) Uani 1 1 d . . . 
H1A H 0.5480 0.4627 0.3953 0.080 Uiso 1 1 calc R . . 
H1B H 0.5317 0.5224 0.3268 0.080 Uiso 1 1 calc R . . 
C2 C 0.5871(3) 0.6132(2) 0.39125(13) 0.0478(7) Uani 1 1 d . . . 
C3 C 0.6643(4) 0.5908(4) 0.4513(2) 0.154(2) Uani 1 1 d . . . 
H3A H 0.6262 0.5472 0.4819 0.231 Uiso 1 1 calc R . . 
H3B H 0.6631 0.6607 0.4686 0.231 Uiso 1 1 calc R . . 
H3C H 0.7530 0.5500 0.4419 0.231 Uiso 1 1 calc R . . 
C4 C 0.6443(5) 0.6817(3) 0.3426(2) 0.172(3) Uani 1 1 d . . . 
H4A H 0.5937 0.6953 0.3044 0.258 Uiso 1 1 calc R . . 
H4B H 0.7330 0.6416 0.3328 0.258 Uiso 1 1 calc R . . 
H4C H 0.6427 0.7520 0.3595 0.258 Uiso 1 1 calc R . . 
C5 C 0.4493(3) 0.6794(3) 0.40771(17) 0.0902(12) Uani 1 1 d . . . 
H5A H 0.3984 0.6974 0.3696 0.135 Uiso 1 1 calc R . . 
H5B H 0.4515 0.7475 0.4262 0.135 Uiso 1 1 calc R . . 
H5C H 0.4105 0.6356 0.4378 0.135 Uiso 1 1 calc R . . 
C6 C 1.0143(3) 0.1811(2) 0.42234(12) 0.0484(7) Uani 1 1 d . . . 
H6A H 1.0984 0.1817 0.4028 0.058 Uiso 1 1 calc R . . 
H6B H 1.0108 0.1037 0.4265 0.058 Uiso 1 1 calc R . . 
C7 C 1.0079(3) 0.2240(2) 0.48871(12) 0.0416(7) Uani 1 1 d . . . 
C8 C 1.1202(3) 0.1467(3) 0.52727(15) 0.0708(10) Uani 1 1 d . . . 
H8A H 1.1176 0.1722 0.5697 0.106 Uiso 1 1 calc R . . 
H8B H 1.2022 0.1479 0.5068 0.106 Uiso 1 1 calc R . . 
H8C H 1.1116 0.0716 0.5296 0.106 Uiso 1 1 calc R . . 
C9 C 1.0215(3) 0.3427(2) 0.48495(14) 0.0719(10) Uani 1 1 d . . . 
H9A H 0.9506 0.3913 0.4609 0.108 Uiso 1 1 calc R . . 
H9B H 1.1032 0.3439 0.4643 0.108 Uiso 1 1 calc R . . 
H9C H 1.0192 0.3680 0.5273 0.108 Uiso 1 1 calc R . . 
C10 C 0.8795(3) 0.2216(3) 0.52129(14) 0.0748(10) Uani 1 1 d . . . 
H10A H 0.8085 0.2704 0.4974 0.112 Uiso 1 1 calc R . . 
H10B H 0.8774 0.2465 0.5638 0.112 Uiso 1 1 calc R . . 
H10C H 0.8710 0.1464 0.5234 0.112 Uiso 1 1 calc R . . 
C11 C 0.9717(2) 0.5047(2) 0.23484(13) 0.0431(7) Uani 1 1 d . . . 
H11A H 0.9129 0.5724 0.2507 0.052 Uiso 1 1 calc R . . 
H11B H 0.9686 0.5116 0.1885 0.052 Uiso 1 1 calc R . . 
C12 C 1.1099(3) 0.4974(2) 0.25481(13) 0.0445(7) Uani 1 1 d . . . 
C13 C 1.1201(4) 0.4832(4) 0.32688(15) 0.0951(13) Uani 1 1 d . . . 
H13A H 1.0602 0.5462 0.3456 0.143 Uiso 1 1 calc R . . 
H13B H 1.2079 0.4791 0.3388 0.143 Uiso 1 1 calc R . . 
H13C H 1.0989 0.4155 0.3419 0.143 Uiso 1 1 calc R . . 
C14 C 1.2066(3) 0.3970(2) 0.22586(15) 0.0617(9) Uani 1 1 d . . . 
H14A H 1.2007 0.4049 0.1801 0.092 Uiso 1 1 calc R . . 
H14B H 1.1858 0.3292 0.2413 0.092 Uiso 1 1 calc R . . 
H14C H 1.2939 0.3938 0.2380 0.092 Uiso 1 1 calc R . . 
C15 C 1.1430(3) 0.6046(3) 0.22910(19) 0.0881(12) Uani 1 1 d . . . 
H15A H 1.1358 0.6119 0.1834 0.132 Uiso 1 1 calc R . . 
H15B H 1.2309 0.6012 0.2404 0.132 Uiso 1 1 calc R . . 
H15C H 1.0832 0.6682 0.2473 0.132 Uiso 1 1 calc R . . 
C16 C 0.6665(2) 0.0930(2) 0.33319(12) 0.0382(6) Uani 1 1 d . . . 
H16A H 0.7375 0.0400 0.3560 0.046 Uiso 1 1 calc R . . 
H16B H 0.6499 0.0577 0.2957 0.046 Uiso 1 1 calc R . . 
C17 C 0.5442(2) 0.1157(2) 0.37614(11) 0.0361(6) Uani 1 1 d . . . 
C18 C 0.4291(3) 0.1956(3) 0.34139(15) 0.0661(9) Uani 1 1 d . . . 
H18A H 0.3530 0.2094 0.3690 0.099 Uiso 1 1 calc R . . 
H18B H 0.4122 0.1628 0.3036 0.099 Uiso 1 1 calc R . . 
H18C H 0.4495 0.2651 0.3297 0.099 Uiso 1 1 calc R . . 
C19 C 0.5136(3) 0.0047(2) 0.39413(15) 0.0646(9) Uani 1 1 d . . . 
H19A H 0.4366 0.0175 0.4210 0.097 Uiso 1 1 calc R . . 
H19B H 0.5861 -0.0450 0.4166 0.097 Uiso 1 1 calc R . . 
H19C H 0.4990 -0.0286 0.3560 0.097 Uiso 1 1 calc R . . 
C20 C 0.5682(3) 0.1664(3) 0.43717(13) 0.0641(9) Uani 1 1 d . . . 
H20A H 0.4904 0.1809 0.4636 0.096 Uiso 1 1 calc R . . 
H20B H 0.5905 0.2354 0.4265 0.096 Uiso 1 1 calc R . . 
H20C H 0.6389 0.1148 0.4599 0.096 Uiso 1 1 calc R . . 
C21 C 0.5374(2) 0.4674(2) 0.17316(12) 0.0390(7) Uani 1 1 d . . . 
H21A H 0.4895 0.5008 0.2104 0.047 Uiso 1 1 calc R . . 
H21B H 0.4854 0.4252 0.1542 0.047 Uiso 1 1 calc R . . 
C22 C 0.5522(2) 0.5617(2) 0.12478(12) 0.0389(7) Uani 1 1 d . . . 
C23 C 0.6296(3) 0.5125(2) 0.06626(13) 0.0593(8) Uani 1 1 d . . . 
H23A H 0.5853 0.4656 0.0470 0.089 Uiso 1 1 calc R . . 
H23B H 0.7155 0.4687 0.0788 0.089 Uiso 1 1 calc R . . 
H23C H 0.6371 0.5722 0.0360 0.089 Uiso 1 1 calc R . . 
C24 C 0.6227(3) 0.6365(2) 0.15474(15) 0.0658(9) Uani 1 1 d . . . 
H24A H 0.7089 0.5929 0.1669 0.099 Uiso 1 1 calc R . . 
H24B H 0.5745 0.6675 0.1919 0.099 Uiso 1 1 calc R . . 
H24C H 0.6293 0.6962 0.1243 0.099 Uiso 1 1 calc R . . 
C25 C 0.4157(3) 0.6305(3) 0.10486(15) 0.0706(10) Uani 1 1 d . . . 
H25A H 0.3715 0.5829 0.0861 0.106 Uiso 1 1 calc R . . 
H25B H 0.4227 0.6897 0.0742 0.106 Uiso 1 1 calc R . . 
H25C H 0.3669 0.6621 0.1417 0.106 Uiso 1 1 calc R . . 
C26 C 1.1300(3) 0.0778(2) 0.24425(13) 0.0427(7) Uani 1 1 d . . . 
H26A H 1.1637 0.0957 0.2834 0.051 Uiso 1 1 calc R . . 
H26B H 1.1811 0.0997 0.2089 0.051 Uiso 1 1 calc R . . 
C27 C 1.1501(3) -0.0488(2) 0.24549(12) 0.0410(7) Uani 1 1 d . . . 
C28 C 1.0778(4) -0.0851(2) 0.30253(15) 0.0863(12) Uani 1 1 d . . . 
H28A H 0.9859 -0.0486 0.2990 0.129 Uiso 1 1 calc R . . 
H28B H 1.1098 -0.0649 0.3410 0.129 Uiso 1 1 calc R . . 
H28C H 1.0916 -0.1649 0.3039 0.129 Uiso 1 1 calc R . . 
C29 C 1.1014(3) -0.0806(2) 0.18487(14) 0.0677(10) Uani 1 1 d . . . 
H29A H 1.0092 -0.0454 0.1813 0.102 Uiso 1 1 calc R . . 
H29B H 1.1171 -0.1606 0.1858 0.102 Uiso 1 1 calc R . . 
H29C H 1.1469 -0.0561 0.1488 0.102 Uiso 1 1 calc R . . 
C30 C 1.2954(3) -0.1065(3) 0.2510(2) 0.1046(14) Uani 1 1 d . . . 
H30A H 1.3414 -0.0834 0.2146 0.157 Uiso 1 1 calc R . . 
H30B H 1.3093 -0.1864 0.2524 0.157 Uiso 1 1 calc R . . 
H30C H 1.3275 -0.0863 0.2894 0.157 Uiso 1 1 calc R . . 
C31 C 1.0146(3) 0.3108(2) 0.07276(13) 0.0513(8) Uani 1 1 d . . . 
H31A H 1.1013 0.2995 0.0898 0.062 Uiso 1 1 calc R . . 
H31B H 0.9795 0.3905 0.0622 0.062 Uiso 1 1 calc R . . 
C32 C 1.0281(3) 0.2499(2) 0.01157(12) 0.0425(7) Uani 1 1 d . . . 
C33 C 1.0836(4) 0.1255(3) 0.02504(16) 0.0972(13) Uani 1 1 d . . . 
H33A H 1.0909 0.0883 -0.0141 0.146 Uiso 1 1 calc R . . 
H33B H 1.0267 0.0980 0.0545 0.146 Uiso 1 1 calc R . . 
H33C H 1.1687 0.1109 0.0434 0.146 Uiso 1 1 calc R . . 
C34 C 1.1177(4) 0.2933(3) -0.03506(15) 0.0866(12) Uani 1 1 d . . . 
H34A H 1.1264 0.2547 -0.0738 0.130 Uiso 1 1 calc R . . 
H34B H 1.2023 0.2803 -0.0165 0.130 Uiso 1 1 calc R . . 
H34C H 1.0813 0.3723 -0.0444 0.130 Uiso 1 1 calc R . . 
C35 C 0.8945(4) 0.2725(4) -0.01753(16) 0.1072(15) Uani 1 1 d . . . 
H35A H 0.9020 0.2338 -0.0562 0.161 Uiso 1 1 calc R . . 
H35B H 0.8597 0.3516 -0.0271 0.161 Uiso 1 1 calc R . . 
H35C H 0.8369 0.2463 0.0122 0.161 Uiso 1 1 calc R . . 
C36 C 0.7045(3) 0.0703(2) 0.13844(12) 0.0442(7) Uani 1 1 d . . . 
H36A H 0.7060 0.0204 0.1763 0.053 Uiso 1 1 calc R . . 
H36B H 0.7713 0.0314 0.1089 0.053 Uiso 1 1 calc R . . 
C37 C 0.5716(3) 0.0927(2) 0.10740(12) 0.0406(7) Uani 1 1 d . . . 
C38 C 0.5501(3) -0.0195(2) 0.09281(14) 0.0635(9) Uani 1 1 d . . . 
H38A H 0.5523 -0.0651 0.1318 0.095 Uiso 1 1 calc R . . 
H38B H 0.6180 -0.0571 0.0642 0.095 Uiso 1 1 calc R . . 
H38C H 0.4665 -0.0069 0.0733 0.095 Uiso 1 1 calc R . . 
C39 C 0.5676(3) 0.1653(3) 0.04594(13) 0.0661(10) Uani 1 1 d . . . 
H39A H 0.6349 0.1278 0.0170 0.099 Uiso 1 1 calc R . . 
H39B H 0.5817 0.2357 0.0553 0.099 Uiso 1 1 calc R . . 
H39C H 0.4837 0.1785 0.0267 0.099 Uiso 1 1 calc R . . 
C40 C 0.4648(3) 0.1512(3) 0.15351(15) 0.0657(9) Uani 1 1 d . . . 
H40A H 0.4680 0.1050 0.1924 0.099 Uiso 1 1 calc R . . 
H40B H 0.3809 0.1639 0.1344 0.099 Uiso 1 1 calc R . . 
H40C H 0.4783 0.2218 0.1629 0.099 Uiso 1 1 calc R . . 

loop_ 
  _atom_site_aniso_label 
  _atom_site_aniso_U_11 
  _atom_site_aniso_U_22 
  _atom_site_aniso_U_33 
  _atom_site_aniso_U_23 
  _atom_site_aniso_U_13 
  _atom_site_aniso_U_12 
Li1 0.047(3) 0.050(3) 0.035(2) -0.009(2) 0.009(2) -0.018(2) 
Li2 0.054(3) 0.047(3) 0.042(3) -0.009(2) -0.004(2) -0.023(2) 
Li3 0.041(3) 0.035(3) 0.048(3) -0.003(2) -0.001(2) -0.008(2) 
Li4 0.044(3) 0.045(3) 0.038(3) -0.003(2) -0.002(2) -0.010(2) 
Li5 0.042(3) 0.039(3) 0.042(3) 0.002(2) -0.004(2) -0.016(2) 
Li6 0.037(3) 0.041(3) 0.047(3) -0.006(2) 0.004(2) -0.014(2) 
Li7 0.042(3) 0.041(3) 0.037(3) -0.011(2) 0.001(2) -0.010(2) 
Li8 0.042(3) 0.046(3) 0.039(3) 0.001(2) -0.002(2) -0.006(2) 
O1 0.0410(12) 0.0352(10) 0.0506(11) -0.0163(8) 0.0103(9) -0.0051(9) 
O2 0.0435(12) 0.0505(11) 0.0312(10) 0.0013(8) -0.0076(9) -0.0136(9) 
O3 0.0386(11) 0.0338(10) 0.0422(10) -0.0015(8) 0.0017(8) -0.0168(8) 
O4 0.0402(11) 0.0346(10) 0.0334(10) 0.0005(8) 0.0007(8) -0.0159(8) 
O5 0.0335(11) 0.0358(10) 0.0369(10) 0.0043(8) -0.0049(8) -0.0041(8) 
O6 0.0309(11) 0.0317(10) 0.0405(10) -0.0035(8) -0.0017(8) -0.0027(8) 
O7 0.0444(12) 0.0470(11) 0.0338(10) -0.0017(8) 0.0089(8) -0.0140(9) 
O8 0.0464(12) 0.0413(11) 0.0404(11) -0.0078(8) -0.0071(9) -0.0188(9) 
C1 0.062(2) 0.064(2) 0.076(2) -0.0265(18) 0.0091(18) -0.0148(17) 
C2 0.050(2) 0.0452(18) 0.0434(17) -0.0125(14) 0.0037(14) -0.0027(14) 
C3 0.114(4) 0.162(4) 0.147(4) -0.105(4) -0.071(3) 0.060(3) 
C4 0.245(7) 0.052(3) 0.203(5) -0.024(3) 0.149(5) -0.031(3) 
C5 0.076(3) 0.087(3) 0.087(3) -0.036(2) 0.001(2) 0.019(2) 
C6 0.049(2) 0.0489(18) 0.0456(18) -0.0031(14) -0.0062(15) -0.0103(14) 
C7 0.0455(19) 0.0435(17) 0.0365(16) 0.0028(13) -0.0105(13) -0.0131(13) 
C8 0.074(3) 0.070(2) 0.062(2) 0.0053(17) -0.0298(19) -0.0080(18) 
C9 0.105(3) 0.057(2) 0.059(2) -0.0057(16) -0.029(2) -0.0275(19) 
C10 0.066(3) 0.116(3) 0.0427(19) 0.0007(18) -0.0004(17) -0.026(2) 
C11 0.0409(18) 0.0315(16) 0.0536(18) 0.0010(13) 0.0061(14) -0.0060(13) 
C12 0.0453(19) 0.0413(17) 0.0524(18) -0.0057(13) 0.0056(14) -0.0209(14) 
C13 0.086(3) 0.158(4) 0.066(2) -0.028(2) -0.003(2) -0.069(3) 
C14 0.0382(19) 0.051(2) 0.093(2) -0.0047(17) 0.0029(17) -0.0086(15) 
C15 0.072(3) 0.052(2) 0.152(4) -0.010(2) 0.027(2) -0.0388(19) 
C16 0.0412(17) 0.0337(15) 0.0386(16) -0.0005(12) -0.0035(13) -0.0085(12) 
C17 0.0386(17) 0.0364(15) 0.0352(15) -0.0001(12) 0.0015(12) -0.0141(12) 
C18 0.042(2) 0.077(2) 0.071(2) 0.0144(18) 0.0007(17) -0.0070(16) 
C19 0.078(3) 0.056(2) 0.069(2) 0.0053(16) 0.0072(18) -0.0363(18) 
C20 0.074(2) 0.083(2) 0.0454(19) -0.0175(16) 0.0160(16) -0.0383(19) 
C21 0.0331(17) 0.0443(17) 0.0389(16) 0.0037(13) -0.0016(12) -0.0105(13) 
C22 0.0337(17) 0.0391(16) 0.0393(16) 0.0059(12) 0.0000(13) -0.0042(12) 
C23 0.071(2) 0.057(2) 0.0423(18) 0.0106(14) 0.0039(16) -0.0074(16) 
C24 0.080(3) 0.0478(19) 0.073(2) 0.0073(16) -0.0027(18) -0.0270(17) 
C25 0.050(2) 0.076(2) 0.067(2) 0.0269(18) -0.0010(17) 0.0071(16) 
C26 0.0385(18) 0.0363(16) 0.0529(18) -0.0034(13) -0.0035(14) -0.0090(13) 
C27 0.0442(18) 0.0304(15) 0.0434(17) -0.0020(12) -0.0037(13) -0.0013(12) 
C28 0.152(4) 0.0394(19) 0.062(2) 0.0017(16) 0.026(2) -0.023(2) 
C29 0.107(3) 0.0361(18) 0.056(2) -0.0056(15) -0.0093(19) -0.0115(17) 
C30 0.072(3) 0.057(2) 0.166(4) -0.015(2) -0.031(3) 0.0194(19) 
C31 0.056(2) 0.0507(18) 0.0509(19) -0.0041(14) 0.0120(15) -0.0212(15) 
C32 0.0362(17) 0.0525(19) 0.0363(16) 0.0007(13) 0.0059(13) -0.0094(13) 
C33 0.147(4) 0.059(2) 0.071(2) -0.0129(19) 0.039(2) -0.007(2) 
C34 0.100(3) 0.099(3) 0.064(2) -0.004(2) 0.039(2) -0.039(2) 
C35 0.068(3) 0.200(5) 0.053(2) -0.032(3) -0.004(2) -0.029(3) 
C36 0.051(2) 0.0408(17) 0.0424(17) -0.0078(13) -0.0030(14) -0.0135(14) 
C37 0.0449(18) 0.0439(17) 0.0384(16) -0.0053(13) -0.0039(13) -0.0200(13) 
C38 0.080(3) 0.059(2) 0.064(2) -0.0140(16) -0.0049(17) -0.0366(18) 
C39 0.086(3) 0.076(2) 0.0479(19) 0.0069(17) -0.0247(17) -0.0413(19) 
C40 0.050(2) 0.075(2) 0.079(2) -0.0277(18) 0.0069(17) -0.0230(17) 

_geom_special_details 
; 
  All esds (except the esd in the dihedral angle between two l.s. planes) 
  are estimated using the full covariance matrix.  The cell esds are taken 
  into account individually in the estimation of esds in distances, angles 
  and torsion angles; correlations between esds in cell parameters are only 
  used when they are defined by crystal symmetry.  An approximate (isotropic) 
  treatment of cell esds is used for estimating esds involving l.s. planes. 
; 

loop_ 
  _geom_bond_atom_site_label_1 
  _geom_bond_atom_site_label_2 
  _geom_bond_distance 
  _geom_bond_site_symmetry_2 
  _geom_bond_publ_flag 
Li1 O2 1.869(5) . ? 
Li1 O4 1.872(4) . ? 
Li1 O1 1.875(5) . ? 
Li1 Li4 2.411(6) . ? 
Li1 Li2 2.426(6) . ? 
Li1 C1 2.744(5) . ? 
Li1 Li3 3.045(6) . ? 
Li1 Li5 3.239(6) . ? 
Li2 O2 1.869(5) . ? 
Li2 O1 1.884(5) . ? 
Li2 O3 1.886(5) . ? 
Li2 Li3 2.451(6) . ? 
Li2 Li4 2.979(6) . ? 
Li2 Li6 3.243(6) . ? 
Li3 O5 1.858(4) . ? 
Li3 O1 1.886(5) . ? 
Li3 O3 1.905(5) . ? 
Li3 C1 2.759(5) . ? 
Li3 C21 2.760(5) . ? 
Li3 C11 2.777(5) . ? 
Li3 Li5 2.927(6) . ? 
Li3 Li6 2.975(6) . ? 
Li3 Li8 3.265(6) . ? 
Li4 O6 1.840(5) . ? 
Li4 O2 1.903(4) . ? 
Li4 O4 1.934(5) . ? 
Li4 C6 2.759(5) . ? 
Li4 C26 2.771(5) . ? 
Li4 C16 2.788(5) . ? 
Li4 Li6 2.965(6) . ? 
Li4 Li5 2.969(6) . ? 
Li4 Li7 3.181(6) . ? 
Li5 O4 1.863(4) . ? 
Li5 O8 1.894(5) . ? 
Li5 O5 1.943(4) . ? 
Li5 Li8 2.499(6) . ? 
Li5 C16 2.759(5) . ? 
Li5 Li7 3.046(6) . ? 
Li6 O3 1.857(5) . ? 
Li6 O7 1.906(5) . ? 
Li6 O6 1.920(4) . ? 
Li6 Li7 2.442(6) . ? 
Li6 C11 2.712(5) . ? 
Li6 C26 2.765(5) . ? 
Li6 C31 2.789(5) . ? 
Li6 Li8 2.971(6) . ? 
Li7 O6 1.872(4) . ? 
Li7 O8 1.884(5) . ? 
Li7 O7 1.892(4) . ? 
Li7 Li8 2.412(6) . ? 
Li7 C36 2.730(5) . ? 
Li8 O7 1.863(5) . ? 
Li8 O8 1.882(4) . ? 
Li8 O5 1.902(5) . ? 
Li8 C23 2.763(5) . ? 
Li8 C21 2.782(5) . ? 
O1 C1 1.402(3) . ? 
O2 C6 1.405(3) . ? 
O3 C11 1.401(3) . ? 
O4 C16 1.408(3) . ? 
O5 C21 1.403(3) . ? 
O6 C26 1.392(3) . ? 
O7 C31 1.396(3) . ? 
O8 C36 1.403(3) . ? 
C1 C2 1.494(4) . ? 
C2 C3 1.494(4) . ? 
C2 C4 1.501(4) . ? 
C2 C5 1.510(4) . ? 
C6 C7 1.516(4) . ? 
C7 C10 1.510(4) . ? 
C7 C9 1.516(4) . ? 
C7 C8 1.527(4) . ? 
C11 C12 1.517(3) . ? 
C12 C13 1.513(4) . ? 
C12 C15 1.527(4) . ? 
C12 C14 1.528(4) . ? 
C16 C17 1.526(3) . ? 
C17 C18 1.519(4) . ? 
C17 C19 1.521(3) . ? 
C17 C20 1.523(3) . ? 
C21 C22 1.533(3) . ? 
C22 C23 1.520(4) . ? 
C22 C24 1.521(4) . ? 
C22 C25 1.523(4) . ? 
C26 C27 1.527(3) . ? 
C27 C29 1.505(4) . ? 
C27 C28 1.508(4) . ? 
C27 C30 1.518(4) . ? 
C31 C32 1.515(4) . ? 
C32 C33 1.506(4) . ? 
C32 C35 1.512(4) . ? 
C32 C34 1.514(4) . ? 
C36 C37 1.523(3) . ? 
C37 C39 1.516(3) . ? 
C37 C40 1.521(4) . ? 
C37 C38 1.524(3) . ? 

loop_ 
  _geom_angle_atom_site_label_1 
  _geom_angle_atom_site_label_2 
  _geom_angle_atom_site_label_3 
  _geom_angle 
  _geom_angle_site_symmetry_1 
  _geom_angle_site_symmetry_3 
  _geom_angle_publ_flag 
O2 Li1 O4 102.2(2) . . ? 
O2 Li1 O1 99.2(2) . . ? 
O4 Li1 O1 117.2(2) . . ? 
O2 Li1 Li4 50.90(15) . . ? 
O4 Li1 Li4 51.83(15) . . ? 
O1 Li1 Li4 113.2(2) . . ? 
O2 Li1 Li2 49.53(16) . . ? 
O4 Li1 Li2 116.6(2) . . ? 
O1 Li1 Li2 49.96(15) . . ? 
Li4 Li1 Li2 76.02(19) . . ? 
O2 Li1 C1 123.1(2) . . ? 
O4 Li1 C1 118.6(2) . . ? 
O1 Li1 C1 28.08(11) . . ? 
Li4 Li1 C1 138.4(2) . . ? 
Li2 Li1 C1 76.31(17) . . ? 
O2 Li1 Li3 93.43(18) . . ? 
O4 Li1 Li3 84.15(17) . . ? 
O1 Li1 Li3 36.08(12) . . ? 
Li4 Li1 Li3 81.84(17) . . ? 
Li2 Li1 Li3 51.73(15) . . ? 
C1 Li1 Li3 56.63(13) . . ? 
O2 Li1 Li5 108.67(19) . . ? 
O4 Li1 Li5 29.78(11) . . ? 
O1 Li1 Li5 87.45(17) . . ? 
Li4 Li1 Li5 61.34(16) . . ? 
Li2 Li1 Li5 97.94(18) . . ? 
C1 Li1 Li5 92.76(16) . . ? 
Li3 Li1 Li5 55.42(13) . . ? 
O2 Li2 O1 98.8(2) . . ? 
O2 Li2 O3 120.7(2) . . ? 
O1 Li2 O3 99.1(2) . . ? 
O2 Li2 Li1 49.52(15) . . ? 
O1 Li2 Li1 49.62(16) . . ? 
O3 Li2 Li1 116.6(2) . . ? 
O2 Li2 Li3 115.5(2) . . ? 
O1 Li2 Li3 49.50(15) . . ? 
O3 Li2 Li3 50.06(15) . . ? 
Li1 Li2 Li3 77.26(19) . . ? 
O2 Li2 Li4 38.25(12) . . ? 
O1 Li2 Li4 92.35(17) . . ? 
O3 Li2 Li4 84.98(17) . . ? 
Li1 Li2 Li4 51.76(15) . . ? 
Li3 Li2 Li4 82.61(17) . . ? 
O2 Li2 Li6 90.96(18) . . ? 
O1 Li2 Li6 107.00(18) . . ? 
O3 Li2 Li6 29.71(12) . . ? 
Li1 Li2 Li6 99.32(17) . . ? 
Li3 Li2 Li6 61.15(16) . . ? 
Li4 Li2 Li6 56.74(13) . . ? 
O5 Li3 O1 127.8(2) . . ? 
O5 Li3 O3 121.6(2) . . ? 
O1 Li3 O3 98.4(2) . . ? 
O5 Li3 Li2 145.1(2) . . ? 
O1 Li3 Li2 49.42(16) . . ? 
O3 Li3 Li2 49.39(15) . . ? 
O5 Li3 C1 113.8(2) . . ? 
O1 Li3 C1 27.86(11) . . ? 
O3 Li3 C1 122.1(2) . . ? 
Li2 Li3 C1 75.66(18) . . ? 
O5 Li3 C21 27.46(10) . . ? 
O1 Li3 C21 120.2(2) . . ? 
O3 Li3 C21 140.9(2) . . ? 
Li2 Li3 C21 165.0(2) . . ? 
C1 Li3 C21 96.78(16) . . ? 
O5 Li3 C11 123.6(2) . . ? 
O1 Li3 C11 107.53(19) . . ? 
O3 Li3 C11 27.58(9) . . ? 
Li2 Li3 C11 66.03(16) . . ? 
C1 Li3 C11 120.85(17) . . ? 
C21 Li3 C11 128.38(17) . . ? 
O5 Li3 Li5 40.73(12) . . ? 
O1 Li3 Li5 96.97(18) . . ? 
O3 Li3 Li5 110.7(2) . . ? 
Li2 Li3 Li5 106.10(19) . . ? 
C1 Li3 Li5 99.63(17) . . ? 
C21 Li3 Li5 61.86(13) . . ? 
C11 Li3 Li5 132.67(19) . . ? 
O5 Li3 Li6 86.03(18) . . ? 
O1 Li3 Li6 117.8(2) . . ? 
O3 Li3 Li6 37.17(12) . . ? 
Li2 Li3 Li6 72.68(18) . . ? 
C1 Li3 Li6 145.5(2) . . ? 
C21 Li3 Li6 110.59(17) . . ? 
C11 Li3 Li6 56.13(12) . . ? 
Li5 Li3 Li6 76.71(16) . . ? 
O5 Li3 Li1 104.53(19) . . ? 
O1 Li3 Li1 35.82(12) . . ? 
O3 Li3 Li1 93.19(18) . . ? 
Li2 Li3 Li1 51.01(15) . . ? 
C1 Li3 Li1 56.18(13) . . ? 
C21 Li3 Li1 114.01(17) . . ? 
C11 Li3 Li1 116.09(17) . . ? 
Li5 Li3 Li1 65.66(14) . . ? 
Li6 Li3 Li1 92.63(17) . . ? 
O5 Li3 Li8 30.12(12) . . ? 
O1 Li3 Li8 143.7(2) . . ? 
O3 Li3 Li8 91.46(18) . . ? 
Li2 Li3 Li8 125.5(2) . . ? 
C1 Li3 Li8 141.89(18) . . ? 
C21 Li3 Li8 54.22(12) . . ? 
C11 Li3 Li8 97.27(16) . . ? 
Li5 Li3 Li8 47.22(13) . . ? 
Li6 Li3 Li8 56.63(13) . . ? 
Li1 Li3 Li8 109.23(16) . . ? 
O6 Li4 O2 125.1(2) . . ? 
O6 Li4 O4 125.3(2) . . ? 
O2 Li4 O4 98.7(2) . . ? 
O6 Li4 Li1 146.1(2) . . ? 
O2 Li4 Li1 49.64(15) . . ? 
O4 Li4 Li1 49.56(15) . . ? 
O6 Li4 C6 116.5(2) . . ? 
O2 Li4 C6 28.14(10) . . ? 
O4 Li4 C6 117.1(2) . . ? 
Li1 Li4 C6 73.19(16) . . ? 
O6 Li4 C26 26.48(10) . . ? 
O2 Li4 C26 112.4(2) . . ? 
O4 Li4 C26 147.9(2) . . ? 
Li1 Li4 C26 157.5(2) . . ? 
C6 Li4 C26 94.71(15) . . ? 
O6 Li4 C16 127.4(2) . . ? 
O2 Li4 C16 107.0(2) . . ? 
O4 Li4 C16 27.90(9) . . ? 
Li1 Li4 C16 66.04(15) . . ? 
C6 Li4 C16 112.73(17) . . ? 
C26 Li4 C16 136.31(18) . . ? 
O6 Li4 Li6 38.90(13) . . ? 
O2 Li4 Li6 99.17(18) . . ? 
O4 Li4 Li6 111.2(2) . . ? 
Li1 Li4 Li6 107.7(2) . . ? 
C6 Li4 Li6 108.74(17) . . ? 
C26 Li4 Li6 57.51(13) . . ? 
C16 Li4 Li6 133.09(18) . . ? 
O6 Li4 Li5 89.00(18) . . ? 
O2 Li4 Li5 118.7(2) . . ? 
O4 Li4 Li5 37.72(12) . . ? 
Li1 Li4 Li5 73.21(18) . . ? 
C6 Li4 Li5 145.9(2) . . ? 
C26 Li4 Li5 114.67(17) . . ? 
C16 Li4 Li5 57.16(12) . . ? 
Li6 Li4 Li5 76.23(15) . . ? 
O6 Li4 Li2 101.77(19) . . ? 
O2 Li4 Li2 37.45(12) . . ? 
O4 Li4 Li2 94.18(19) . . ? 
Li1 Li4 Li2 52.22(16) . . ? 
C6 Li4 Li2 61.41(13) . . ? 
C26 Li4 Li2 105.46(17) . . ? 
C16 Li4 Li2 117.29(18) . . ? 
Li6 Li4 Li2 66.13(15) . . ? 
Li5 Li4 Li2 92.80(17) . . ? 
O6 Li4 Li7 31.29(12) . . ? 
O2 Li4 Li7 145.8(2) . . ? 
O4 Li4 Li7 94.09(17) . . ? 
Li1 Li4 Li7 129.1(2) . . ? 
C6 Li4 Li7 147.49(19) . . ? 
C26 Li4 Li7 55.52(12) . . ? 
C16 Li4 Li7 99.06(15) . . ? 
Li6 Li4 Li7 46.64(12) . . ? 
Li5 Li4 Li7 59.26(14) . . ? 
Li2 Li4 Li7 110.28(17) . . ? 
O4 Li5 O8 123.6(2) . . ? 
O4 Li5 O5 125.7(2) . . ? 
O8 Li5 O5 96.51(19) . . ? 
O4 Li5 Li8 142.6(2) . . ? 
O8 Li5 Li8 48.34(14) . . ? 
O5 Li5 Li8 48.74(14) . . ? 
O4 Li5 C16 27.74(9) . . ? 
O8 Li5 C16 110.53(19) . . ? 
O5 Li5 C16 150.9(2) . . ? 
Li8 Li5 C16 153.4(2) . . ? 
O4 Li5 Li3 87.77(17) . . ? 
O8 Li5 Li3 117.8(2) . . ? 
O5 Li5 Li3 38.60(12) . . ? 
Li8 Li5 Li3 73.50(16) . . ? 
C16 Li5 Li3 114.93(17) . . ? 
O4 Li5 Li4 39.42(13) . . ? 
O8 Li5 Li4 96.20(19) . . ? 
O5 Li5 Li4 109.71(18) . . ? 
Li8 Li5 Li4 103.54(19) . . ? 
C16 Li5 Li4 58.12(13) . . ? 
Li3 Li5 Li4 75.40(15) . . ? 
O4 Li5 Li7 100.09(19) . . ? 
O8 Li5 Li7 36.16(12) . . ? 
O5 Li5 Li7 92.24(17) . . ? 
Li8 Li5 Li7 50.40(15) . . ? 
C16 Li5 Li7 103.07(16) . . ? 
Li3 Li5 Li7 92.74(16) . . ? 
Li4 Li5 Li7 63.85(14) . . ? 
O4 Li5 Li1 29.94(11) . . ? 
O8 Li5 Li1 141.6(2) . . ? 
O5 Li5 Li1 95.90(17) . . ? 
Li8 Li5 Li1 126.98(19) . . ? 
C16 Li5 Li1 56.07(12) . . ? 
Li3 Li5 Li1 58.92(13) . . ? 
Li4 Li5 Li1 45.45(13) . . ? 
Li7 Li5 Li1 107.21(16) . . ? 
O3 Li6 O7 128.2(2) . . ? 
O3 Li6 O6 121.4(2) . . ? 
O7 Li6 O6 97.93(19) . . ? 
O3 Li6 Li7 142.6(2) . . ? 
O7 Li6 Li7 49.75(14) . . ? 
O6 Li6 Li7 49.05(14) . . ? 
O3 Li6 C11 28.64(9) . . ? 
O7 Li6 C11 114.9(2) . . ? 
O6 Li6 C11 146.1(2) . . ? 
Li7 Li6 C11 158.0(2) . . ? 
O3 Li6 C26 126.6(2) . . ? 
O7 Li6 C26 104.14(18) . . ? 
O6 Li6 C26 27.79(9) . . ? 
Li7 Li6 C26 64.62(15) . . ? 
C11 Li6 C26 136.94(18) . . ? 
O3 Li6 C31 124.7(2) . . ? 
O7 Li6 C31 27.15(10) . . ? 
O6 Li6 C31 112.76(19) . . ? 
Li7 Li6 C31 71.00(16) . . ? 
C11 Li6 C31 100.77(15) . . ? 
C26 Li6 C31 106.26(17) . . ? 
O3 Li6 Li4 85.86(18) . . ? 
O7 Li6 Li4 117.79(19) . . ? 
O6 Li6 Li4 36.99(12) . . ? 
Li7 Li6 Li4 71.34(16) . . ? 
C11 Li6 Li4 113.66(18) . . ? 
C26 Li6 Li4 57.72(13) . . ? 
C31 Li6 Li4 142.30(18) . . ? 
O3 Li6 Li8 102.2(2) . . ? 
O7 Li6 Li8 37.48(13) . . ? 
O6 Li6 Li8 94.38(17) . . ? 
Li7 Li6 Li8 51.82(15) . . ? 
C11 Li6 Li8 106.16(17) . . ? 
C26 Li6 Li8 116.00(16) . . ? 
C31 Li6 Li8 61.82(13) . . ? 
Li4 Li6 Li8 92.98(16) . . ? 
O3 Li6 Li3 38.29(13) . . ? 
O7 Li6 Li3 100.69(19) . . ? 
O6 Li6 Li3 109.16(19) . . ? 
Li7 Li6 Li3 105.50(19) . . ? 
C11 Li6 Li3 58.24(13) . . ? 
C26 Li6 Li3 132.32(18) . . ? 
C31 Li6 Li3 114.13(18) . . ? 
Li4 Li6 Li3 74.74(15) . . ? 
Li8 Li6 Li3 66.60(15) . . ? 
O3 Li6 Li2 30.22(12) . . ? 
O7 Li6 Li2 146.6(2) . . ? 
O6 Li6 Li2 91.33(17) . . ? 
Li7 Li6 Li2 125.0(2) . . ? 
C11 Li6 Li2 56.59(12) . . ? 
C26 Li6 Li2 98.96(16) . . ? 
C31 Li6 Li2 154.52(19) . . ? 
Li4 Li6 Li2 57.14(14) . . ? 
Li8 Li6 Li2 110.07(18) . . ? 
Li3 Li6 Li2 46.17(13) . . ? 
O6 Li7 O8 120.4(2) . . ? 
O6 Li7 O7 100.1(2) . . ? 
O8 Li7 O7 99.2(2) . . ? 
O6 Li7 Li8 116.7(2) . . ? 
O8 Li7 Li8 50.12(15) . . ? 
O7 Li7 Li8 49.50(15) . . ? 
O6 Li7 Li6 50.79(14) . . ? 
O8 Li7 Li6 113.6(2) . . ? 
O7 Li7 Li6 50.26(15) . . ? 
Li8 Li7 Li6 75.47(18) . . ? 
O6 Li7 C36 127.9(2) . . ? 
O8 Li7 C36 28.56(9) . . ? 
O7 Li7 C36 119.4(2) . . ? 
Li8 Li7 C36 74.69(16) . . ? 
Li6 Li7 C36 141.7(2) . . ? 
O6 Li7 Li5 86.10(17) . . ? 
O8 Li7 Li5 36.39(12) . . ? 
O7 Li7 Li5 94.92(18) . . ? 
Li8 Li7 Li5 52.96(15) . . ? 
Li6 Li7 Li5 82.96(17) . . ? 
C36 Li7 Li5 59.87(13) . . ? 
O6 Li7 Li4 30.70(12) . . ? 
O8 Li7 Li4 89.74(17) . . ? 
O7 Li7 Li4 109.39(18) . . ? 
Li8 Li7 Li4 99.73(18) . . ? 
Li6 Li7 Li4 62.02(15) . . ? 
C36 Li7 Li4 100.28(16) . . ? 
Li5 Li7 Li4 56.89(13) . . ? 
O7 Li8 O8 100.4(2) . . ? 
O7 Li8 O5 121.5(2) . . ? 
O8 Li8 O5 98.4(2) . . ? 
O7 Li8 Li7 50.57(15) . . ? 
O8 Li8 Li7 50.21(15) . . ? 
O5 Li8 Li7 116.4(2) . . ? 
O7 Li8 Li5 116.3(2) . . ? 
O8 Li8 Li5 48.78(15) . . ? 
O5 Li8 Li5 50.19(15) . . ? 
Li7 Li8 Li5 76.64(18) . . ? 
O7 Li8 C23 111.8(2) . . ? 
O8 Li8 C23 145.4(2) . . ? 
O5 Li8 C23 75.78(16) . . ? 
Li7 Li8 C23 161.6(2) . . ? 
Li5 Li8 C23 120.5(2) . . ? 
O7 Li8 C21 140.0(2) . . ? 
O8 Li8 C21 107.51(19) . . ? 
O5 Li8 C21 27.48(9) . . ? 
Li7 Li8 C21 141.9(2) . . ? 
Li5 Li8 C21 67.06(15) . . ? 
C23 Li8 C21 53.66(11) . . ? 
O7 Li8 Li6 38.51(13) . . ? 
O8 Li8 Li6 94.22(18) . . ? 
O5 Li8 Li6 85.43(17) . . ? 
Li7 Li8 Li6 52.71(15) . . ? 
Li5 Li8 Li6 83.60(17) . . ? 
C23 Li8 Li6 118.75(18) . . ? 
C21 Li8 Li6 110.11(17) . . ? 
O7 Li8 Li3 92.18(17) . . ? 
O8 Li8 Li3 104.79(18) . . ? 
O5 Li8 Li3 29.36(11) . . ? 
Li7 Li8 Li3 98.11(17) . . ? 
Li5 Li8 Li3 59.27(15) . . ? 
C23 Li8 Li3 86.82(15) . . ? 
C21 Li8 Li3 53.60(12) . . ? 
Li6 Li8 Li3 56.77(14) . . ? 
C1 O1 Li1 112.9(2) . . ? 
C1 O1 Li2 154.0(2) . . ? 
Li1 O1 Li2 80.41(19) . . ? 
C1 O1 Li3 113.2(2) . . ? 
Li1 O1 Li3 108.11(19) . . ? 
Li2 O1 Li3 81.1(2) . . ? 
C6 O2 Li2 126.9(2) . . ? 
C6 O2 Li1 141.6(2) . . ? 
Li2 O2 Li1 81.0(2) . . ? 
C6 O2 Li4 112.1(2) . . ? 
Li2 O2 Li4 104.30(19) . . ? 
Li1 O2 Li4 79.46(19) . . ? 
C11 O3 Li6 111.92(19) . . ? 
C11 O3 Li2 120.31(19) . . ? 
Li6 O3 Li2 120.1(2) . . ? 
C11 O3 Li3 113.42(19) . . ? 
Li6 O3 Li3 104.53(19) . . ? 
Li2 O3 Li3 80.5(2) . . ? 
C16 O4 Li5 114.27(18) . . ? 
C16 O4 Li1 120.05(19) . . ? 
Li5 O4 Li1 120.3(2) . . ? 
C16 O4 Li4 112.12(19) . . ? 
Li5 O4 Li4 102.9(2) . . ? 
Li1 O4 Li4 78.61(19) . . ? 
C21 O5 Li3 114.91(19) . . ? 
C21 O5 Li8 113.81(18) . . ? 
Li3 O5 Li8 120.5(2) . . ? 
C21 O5 Li5 121.14(19) . . ? 
Li3 O5 Li5 100.68(19) . . ? 
Li8 O5 Li5 81.07(19) . . ? 
C26 O6 Li4 117.4(2) . . ? 
C26 O6 Li7 117.14(19) . . ? 
Li4 O6 Li7 118.0(2) . . ? 
C26 O6 Li6 112.19(18) . . ? 
Li4 O6 Li6 104.11(19) . . ? 
Li7 O6 Li6 80.16(19) . . ? 
C31 O7 Li8 130.2(2) . . ? 
C31 O7 Li7 135.6(2) . . ? 
Li8 O7 Li7 79.93(19) . . ? 
C31 O7 Li6 114.32(19) . . ? 
Li8 O7 Li6 104.0(2) . . ? 
Li7 O7 Li6 79.99(18) . . ? 
C36 O8 Li8 144.31(19) . . ? 
C36 O8 Li7 111.48(19) . . ? 
Li8 O8 Li7 79.67(19) . . ? 
C36 O8 Li5 122.13(19) . . ? 
Li8 O8 Li5 82.88(19) . . ? 
Li7 O8 Li5 107.44(19) . . ? 
O1 C1 C2 116.7(2) . . ? 
O1 C1 Li1 38.99(14) . . ? 
C2 C1 Li1 138.0(2) . . ? 
O1 C1 Li3 38.94(15) . . ? 
C2 C1 Li3 118.0(2) . . ? 
Li1 C1 Li3 67.19(14) . . ? 
C1 C2 C3 110.1(3) . . ? 
C1 C2 C4 108.9(3) . . ? 
C3 C2 C4 110.5(4) . . ? 
C1 C2 C5 110.8(3) . . ? 
C3 C2 C5 107.8(3) . . ? 
C4 C2 C5 108.6(3) . . ? 
O2 C6 C7 115.5(2) . . ? 
O2 C6 Li4 39.72(13) . . ? 
C7 C6 Li4 151.2(2) . . ? 
C10 C7 C6 110.0(2) . . ? 
C10 C7 C9 109.7(3) . . ? 
C6 C7 C9 110.4(2) . . ? 
C10 C7 C8 109.1(2) . . ? 
C6 C7 C8 108.1(2) . . ? 
C9 C7 C8 109.5(2) . . ? 
O3 C11 C12 114.4(2) . . ? 
O3 C11 Li6 39.45(13) . . ? 
C12 C11 Li6 103.48(18) . . ? 
O3 C11 Li3 39.01(13) . . ? 
C12 C11 Li3 149.48(19) . . ? 
Li6 C11 Li3 65.64(14) . . ? 
C13 C12 C11 110.4(2) . . ? 
C13 C12 C15 110.9(3) . . ? 
C11 C12 C15 108.0(2) . . ? 
C13 C12 C14 108.7(3) . . ? 
C11 C12 C14 109.9(2) . . ? 
C15 C12 C14 108.8(2) . . ? 
O4 C16 C17 115.0(2) . . ? 
O4 C16 Li5 38.00(12) . . ? 
C17 C16 Li5 116.50(18) . . ? 
O4 C16 Li4 39.98(13) . . ? 
C17 C16 Li4 141.39(18) . . ? 
Li5 C16 Li4 64.71(13) . . ? 
C18 C17 C19 109.9(2) . . ? 
C18 C17 C20 109.4(2) . . ? 
C19 C17 C20 108.6(2) . . ? 
C18 C17 C16 110.3(2) . . ? 
C19 C17 C16 108.4(2) . . ? 
C20 C17 C16 110.3(2) . . ? 
O5 C21 C22 114.7(2) . . ? 
O5 C21 Li3 37.63(13) . . ? 
C22 C21 Li3 103.73(17) . . ? 
O5 C21 Li8 38.71(13) . . ? 
C22 C21 Li8 94.69(17) . . ? 
Li3 C21 Li8 72.18(14) . . ? 
C23 C22 C24 109.1(2) . . ? 
C23 C22 C25 109.4(2) . . ? 
C24 C22 C25 109.8(2) . . ? 
C23 C22 C21 110.1(2) . . ? 
C24 C22 C21 110.3(2) . . ? 
C25 C22 C21 108.1(2) . . ? 
C22 C23 Li8 95.76(17) . . ? 
O6 C26 C27 114.5(2) . . ? 
O6 C26 Li6 40.02(12) . . ? 
C27 C26 Li6 149.44(19) . . ? 
O6 C26 Li4 36.10(13) . . ? 
C27 C26 Li4 104.57(18) . . ? 
Li6 C26 Li4 64.77(14) . . ? 
C29 C27 C28 110.0(2) . . ? 
C29 C27 C30 108.9(3) . . ? 
C28 C27 C30 109.5(3) . . ? 
C29 C27 C26 110.5(2) . . ? 
C28 C27 C26 109.3(2) . . ? 
C30 C27 C26 108.6(2) . . ? 
O7 C31 C32 115.9(2) . . ? 
O7 C31 Li6 38.53(13) . . ? 
C32 C31 Li6 145.5(2) . . ? 
C33 C32 C35 109.3(3) . . ? 
C33 C32 C34 109.5(3) . . ? 
C35 C32 C34 109.2(3) . . ? 
C33 C32 C31 110.6(2) . . ? 
C35 C32 C31 108.9(2) . . ? 
C34 C32 C31 109.4(2) . . ? 
O8 C36 C37 115.4(2) . . ? 
O8 C36 Li7 39.95(13) . . ? 
C37 C36 Li7 148.91(19) . . ? 
C39 C37 C40 109.9(2) . . ? 
C39 C37 C36 110.2(2) . . ? 
C40 C37 C36 109.4(2) . . ? 
C39 C37 C38 109.7(2) . . ? 
C40 C37 C38 109.3(2) . . ? 
C36 C37 C38 108.4(2) . . ? 

_diffrn_measured_fraction_theta_max    0.991 
_diffrn_reflns_theta_full              23.29 
_diffrn_measured_fraction_theta_full   0.991 
_refine_diff_density_max    0.253 
_refine_diff_density_min   -0.193 
_refine_diff_density_rms    0.036 

#===END 

data_d:\frames\kp028\work2\kp028qq 

_audit_creation_method            SHELXL-97 
_chemical_name_systematic 
; 
  Lithium Neo-pentoxide THF 
; 
_chemical_name_common             Li4(ONep)4(THF)3 
_chemical_melting_point           ? 
_chemical_formula_moiety          ? 
_chemical_formula_sum 
  'C32 H68 Li4 O7' 
_chemical_formula_weight          592.62 

loop_ 
  _atom_type_symbol 
  _atom_type_description 
  _atom_type_scat_dispersion_real 
  _atom_type_scat_dispersion_imag 
  _atom_type_scat_source 
  'C'  'C'   0.0033   0.0016 
  'International Tables Vol C Tables 4.2.6.8 and 6.1.1.4' 
  'H'  'H'   0.0000   0.0000 
  'International Tables Vol C Tables 4.2.6.8 and 6.1.1.4' 
  'Li'  'Li'  -0.0003   0.0001 
  'International Tables Vol C Tables 4.2.6.8 and 6.1.1.4' 
  'O'  'O'   0.0106   0.0060 
  'International Tables Vol C Tables 4.2.6.8 and 6.1.1.4' 

_symmetry_cell_setting            ? 
_symmetry_space_group_name_H-M    ? 

loop_ 
  _symmetry_equiv_pos_as_xyz 
  'x, y, z' 
  '-x, -y, -z' 

_cell_length_a                    10.502(3) 
_cell_length_b                    10.507(3) 
_cell_length_c                    18.617(6) 
_cell_angle_alpha                 86.200(5) 
_cell_angle_beta                  79.263(5) 
_cell_angle_gamma                 77.207(5) 
_cell_volume                      1967.7(10) 
_cell_formula_units_Z             2 
_cell_measurement_temperature     168(2) 
_cell_measurement_reflns_used     ? 
_cell_measurement_theta_min       ? 
_cell_measurement_theta_max       ? 

_exptl_crystal_description        ? 
_exptl_crystal_colour             ? 
_exptl_crystal_size_max           ? 
_exptl_crystal_size_mid           ? 
_exptl_crystal_size_min           ? 
_exptl_crystal_density_meas       ? 
_exptl_crystal_density_diffrn     1.000 
_exptl_crystal_density_method     'not measured' 
_exptl_crystal_F_000              656 
_exptl_absorpt_coefficient_mu     0.066 
_exptl_absorpt_correction_type    SADABS 
_exptl_absorpt_correction_T_min   ? 
_exptl_absorpt_correction_T_max   ? 
_exptl_absorpt_process_details    ? 

_exptl_special_details 
; 
  ? 
; 

_diffrn_ambient_temperature       168(2) 
_diffrn_radiation_wavelength      0.71073 
_diffrn_radiation_type            MoK\a 
_diffrn_radiation_source          'fine-focus sealed tube' 
_diffrn_radiation_monochromator   graphite 
_diffrn_measurement_device_type   ? 
_diffrn_measurement_method        ? 
_diffrn_detector_area_resol_mean  ? 
_diffrn_standards_number          ? 
_diffrn_standards_interval_count  ? 
_diffrn_standards_interval_time   ? 
_diffrn_standards_decay_%         ? 
_diffrn_reflns_number             8842 
_diffrn_reflns_av_R_equivalents   0.0683 
_diffrn_reflns_av_sigmaI/netI     0.0876 
_diffrn_reflns_limit_h_min        -11 
_diffrn_reflns_limit_h_max        11 
_diffrn_reflns_limit_k_min        -11 
_diffrn_reflns_limit_k_max        11 
_diffrn_reflns_limit_l_min        -20 
_diffrn_reflns_limit_l_max        11 
_diffrn_reflns_theta_min          1.99 
_diffrn_reflns_theta_max          23.35 
_reflns_number_total              5658 
_reflns_number_gt                 3248 
_reflns_threshold_expression      >2sigma(I) 

_computing_data_collection        ? 
_computing_cell_refinement        ? 
_computing_data_reduction         ? 
_computing_structure_solution     'SHELXS-97 (Sheldrick, 1990)' 
_computing_structure_refinement   'SHELXL-97 (Sheldrick, 1997)' 
_computing_molecular_graphics     ? 
_computing_publication_material   ? 

_refine_special_details 
; 
  Refinement of F^2^ against ALL reflections.  The weighted R-factor wR and 
  goodness of fit S are based on F^2^, conventional R-factors R are based 
  on F, with F set to zero for negative F^2^. The threshold expression of 
  F^2^ > 2sigma(F^2^) is used only for calculating R-factors(gt) etc. and is 
  not relevant to the choice of reflections for refinement.  R-factors based 
  on F^2^ are statistically about twice as large as those based on F, and R- 
  factors based on ALL data will be even larger. 
; 

_refine_ls_structure_factor_coef  Fsqd 
_refine_ls_matrix_type            full 
_refine_ls_weighting_scheme       calc 
_refine_ls_weighting_details 
  'calc w=1/[\s^2^(Fo^2^)+(0.1502P)^2^+0.0000P] where P=(Fo^2^+2Fc^2^)/3' 
_atom_sites_solution_primary      direct 
_atom_sites_solution_secondary    difmap 
_atom_sites_solution_hydrogens    geom 
_refine_ls_hydrogen_treatment     mixed 
_refine_ls_extinction_method      SHELXL 
_refine_ls_extinction_coef        0.000(2) 
_refine_ls_extinction_expression 
  'Fc^*^=kFc[1+0.001xFc^2^\l^3^/sin(2\q)]^-1/4^' 
_refine_ls_number_reflns          5658 
_refine_ls_number_parameters      401 
_refine_ls_number_restraints      0 
_refine_ls_R_factor_all           0.1265 
_refine_ls_R_factor_gt            0.0782 
_refine_ls_wR_factor_ref          0.2524 
_refine_ls_wR_factor_gt           0.2227 
_refine_ls_goodness_of_fit_ref    1.016 
_refine_ls_restrained_S_all       1.016 
_refine_ls_shift/su_max           2.177 
_refine_ls_shift/su_mean          0.006 

loop_ 
  _atom_site_label 
  _atom_site_type_symbol 
  _atom_site_fract_x 
  _atom_site_fract_y 
  _atom_site_fract_z 
  _atom_site_U_iso_or_equiv 
  _atom_site_adp_type 
  _atom_site_occupancy 
  _atom_site_symmetry_multiplicity 
  _atom_site_calc_flag 
  _atom_site_refinement_flags 
  _atom_site_disorder_assembly 
  _atom_site_disorder_group 
Li1 Li 0.9003(6) 0.5330(6) 0.3108(3) 0.0418(15) Uani 1 1 d . . . 
Li2 Li 0.9464(5) 0.6879(6) 0.2080(3) 0.0379(14) Uani 1 1 d . . . 
Li3 Li 0.8362(5) 0.4988(6) 0.1934(3) 0.0374(14) Uani 1 1 d . . . 
Li4 Li 0.7076(6) 0.6944(6) 0.2724(3) 0.0392(14) Uani 1 1 d . . . 
O1 O 1.0099(2) 0.5013(2) 0.21786(13) 0.0389(7) Uani 1 1 d . . . 
O2 O 0.8637(2) 0.7152(2) 0.31003(13) 0.0407(7) Uani 1 1 d . . . 
O3 O 0.7393(2) 0.5053(2) 0.29237(13) 0.0373(6) Uani 1 1 d . . . 
O4 O 0.7872(2) 0.6866(2) 0.17049(12) 0.0361(6) Uani 1 1 d . . . 
O5 O 1.0348(2) 0.8318(2) 0.16683(15) 0.0494(7) Uani 1 1 d . . . 
O6 O 0.8308(2) 0.3670(3) 0.12331(14) 0.0482(7) Uani 1 1 d . . . 
O7 O 0.5348(2) 0.8056(2) 0.31462(16) 0.0544(8) Uani 1 1 d . . . 
C1 C 1.1248(4) 0.4147(4) 0.1900(2) 0.0496(11) Uani 1 1 d . . . 
H1A H 1.1618 0.4494 0.1418 0.060 Uiso 1 1 calc R . . 
H1B H 1.1013 0.3314 0.1816 0.060 Uiso 1 1 calc R . . 
C2 C 1.2339(3) 0.3851(4) 0.2365(2) 0.0448(10) Uani 1 1 d . . . 
C3 C 1.2712(5) 0.5055(5) 0.2553(4) 0.102(2) Uani 1 1 d . . . 
H3A H 1.3276 0.4844 0.2927 0.153 Uiso 1 1 calc R . . 
H3B H 1.1908 0.5698 0.2741 0.153 Uiso 1 1 calc R . . 
H3C H 1.3197 0.5416 0.2114 0.153 Uiso 1 1 calc R . . 
C4 C 1.1793(5) 0.3180(5) 0.3082(3) 0.0830(16) Uani 1 1 d . . . 
H4A H 1.2486 0.2936 0.3384 0.124 Uiso 1 1 calc R . . 
H4B H 1.1517 0.2396 0.2969 0.124 Uiso 1 1 calc R . . 
H4C H 1.1030 0.3783 0.3350 0.124 Uiso 1 1 calc R . . 
C5 C 1.3526(4) 0.2884(5) 0.1984(3) 0.0680(14) Uani 1 1 d . . . 
H5A H 1.3886 0.3267 0.1517 0.102 Uiso 1 1 calc R . . 
H5B H 1.3251 0.2084 0.1895 0.102 Uiso 1 1 calc R . . 
H5C H 1.4208 0.2676 0.2293 0.102 Uiso 1 1 calc R . . 
C6 C 0.8893(4) 0.8080(3) 0.3520(2) 0.0387(9) Uani 1 1 d . . . 
H6A H 0.8246 0.8909 0.3468 0.046 Uiso 1 1 calc R . . 
H6B H 0.9787 0.8237 0.3317 0.046 Uiso 1 1 calc R . . 
C7 C 0.8830(4) 0.7739(4) 0.4328(2) 0.0415(10) Uani 1 1 d . . . 
C8 C 0.9119(4) 0.8850(4) 0.4712(2) 0.0572(12) Uani 1 1 d . . . 
H8A H 1.0007 0.8985 0.4500 0.086 Uiso 1 1 calc R . . 
H8B H 0.9075 0.8630 0.5234 0.086 Uiso 1 1 calc R . . 
H8C H 0.8460 0.9651 0.4648 0.086 Uiso 1 1 calc R . . 
C9 C 0.9874(7) 0.6539(5) 0.4425(3) 0.094(2) Uani 1 1 d . . . 
H9A H 0.9646 0.5784 0.4237 0.140 Uiso 1 1 calc R . . 
H9B H 0.9920 0.6389 0.4946 0.140 Uiso 1 1 calc R . . 
H9C H 1.0735 0.6659 0.4155 0.140 Uiso 1 1 calc R . . 
C10 C 0.7456(5) 0.7500(7) 0.4671(3) 0.100(2) Uani 1 1 d . . . 
H10A H 0.6791 0.8315 0.4656 0.150 Uiso 1 1 calc R . . 
H10B H 0.7457 0.7198 0.5181 0.150 Uiso 1 1 calc R . . 
H10C H 0.7240 0.6835 0.4397 0.150 Uiso 1 1 calc R . . 
C11 C 0.6458(5) 0.4409(6) 0.3296(3) 0.0870(18) Uani 1 1 d . . . 
H11A H 0.5969 0.4187 0.2933 0.104 Uiso 1 1 calc R . . 
H11B H 0.5817 0.5043 0.3628 0.104 Uiso 1 1 calc R . . 
C12 C 0.6839(4) 0.3226(4) 0.3729(2) 0.0554(12) Uani 1 1 d . . . 
C13 C 0.7835(6) 0.3254(6) 0.4192(3) 0.097(2) Uani 1 1 d . . . 
H13A H 0.8628 0.3474 0.3888 0.145 Uiso 1 1 calc R . . 
H13B H 0.8074 0.2394 0.4428 0.145 Uiso 1 1 calc R . . 
H13C H 0.7462 0.3912 0.4567 0.145 Uiso 1 1 calc R . . 
C14 C 0.5762(6) 0.2587(7) 0.4073(4) 0.121(3) Uani 1 1 d . . . 
H14A H 0.5253 0.3073 0.4503 0.181 Uiso 1 1 calc R . . 
H14B H 0.6137 0.1692 0.4224 0.181 Uiso 1 1 calc R . . 
H14C H 0.5176 0.2568 0.3723 0.181 Uiso 1 1 calc R . . 
C15 C 0.7666(9) 0.2215(6) 0.3135(4) 0.153(3) Uani 1 1 d . . . 
H15A H 0.7097 0.2079 0.2798 0.230 Uiso 1 1 calc R . . 
H15B H 0.7997 0.1383 0.3378 0.230 Uiso 1 1 calc R . . 
H15C H 0.8417 0.2555 0.2862 0.230 Uiso 1 1 calc R . . 
C16 C 0.7800(4) 0.7241(4) 0.0985(2) 0.0447(10) Uani 1 1 d . . . 
H16A H 0.8128 0.6457 0.0681 0.054 Uiso 1 1 calc R . . 
H16B H 0.8405 0.7845 0.0823 0.054 Uiso 1 1 calc R . . 
C17 C 0.6424(4) 0.7903(5) 0.0838(2) 0.0568(12) Uani 1 1 d . . . 
C18 C 0.5948(6) 0.9179(5) 0.1251(3) 0.098(2) Uani 1 1 d . . . 
H18A H 0.6533 0.9779 0.1061 0.147 Uiso 1 1 calc R . . 
H18B H 0.5964 0.9000 0.1773 0.147 Uiso 1 1 calc R . . 
H18C H 0.5040 0.9579 0.1184 0.147 Uiso 1 1 calc R . . 
C19 C 0.5484(5) 0.6979(6) 0.1082(3) 0.0954(19) Uani 1 1 d . . . 
H19A H 0.5460 0.6757 0.1603 0.143 Uiso 1 1 calc R . . 
H19B H 0.5796 0.6181 0.0799 0.143 Uiso 1 1 calc R . . 
H19C H 0.4591 0.7405 0.1000 0.143 Uiso 1 1 calc R . . 
C20 C 0.6523(6) 0.8174(7) 0.0011(3) 0.104(2) Uani 1 1 d . . . 
H20A H 0.5640 0.8565 -0.0099 0.156 Uiso 1 1 calc R . . 
H20B H 0.6875 0.7353 -0.0248 0.156 Uiso 1 1 calc R . . 
H20C H 0.7116 0.8778 -0.0149 0.156 Uiso 1 1 calc R . . 
C21 C 1.1625(4) 0.8467(5) 0.1732(3) 0.0752(15) Uani 1 1 d . . . 
H21A H 1.2284 0.8104 0.1303 0.090 Uiso 1 1 calc R . . 
H21B H 1.1895 0.8007 0.2179 0.090 Uiso 1 1 calc R . . 
C22 C 1.1538(8) 0.9903(6) 0.1772(5) 0.125(3) Uani 1 1 d . . . 
H22A H 1.1946 1.0082 0.2183 0.150 Uiso 1 1 calc R . . 
H22B H 1.2015 1.0233 0.1313 0.150 Uiso 1 1 calc R . . 
C23 C 1.0258(8) 1.0488(6) 0.1874(7) 0.199(6) Uani 1 1 d . . . 
H23A H 1.0130 1.1292 0.1563 0.238 Uiso 1 1 calc R . . 
H23B H 0.9948 1.0735 0.2391 0.238 Uiso 1 1 calc R . . 
C24 C 0.9489(5) 0.9585(4) 0.1682(3) 0.0742(14) Uani 1 1 d . . . 
H24A H 0.8674 0.9603 0.2051 0.089 Uiso 1 1 calc R . . 
H24B H 0.9233 0.9827 0.1197 0.089 Uiso 1 1 calc R . . 
C25 C 0.7151(4) 0.3195(5) 0.1166(2) 0.0667(13) Uani 1 1 d . . . 
H25A H 0.6333 0.3840 0.1353 0.080 Uiso 1 1 calc R . . 
H25B H 0.7136 0.2363 0.1447 0.080 Uiso 1 1 calc R . . 
C26 C 0.7248(7) 0.2995(8) 0.0369(3) 0.112(2) Uani 1 1 d . . . 
H26A H 0.7237 0.2078 0.0281 0.135 Uiso 1 1 calc R . . 
H26B H 0.6497 0.3576 0.0180 0.135 Uiso 1 1 calc R . . 
C27 C 0.8471(6) 0.3301(10) 0.0020(3) 0.150(4) Uani 1 1 d . . . 
H27A H 0.8297 0.4105 -0.0287 0.180 Uiso 1 1 calc R . . 
H27B H 0.8985 0.2582 -0.0302 0.180 Uiso 1 1 calc R . . 
C28 C 0.9220(4) 0.3491(5) 0.0552(2) 0.0622(12) Uani 1 1 d . . . 
H28A H 0.9609 0.4269 0.0420 0.075 Uiso 1 1 calc R . . 
H28B H 0.9947 0.2720 0.0586 0.075 Uiso 1 1 calc R . . 
C29 C 0.5176(4) 0.9394(4) 0.3329(3) 0.0742(15) Uani 1 1 d . . . 
H29A H 0.5900 0.9502 0.3577 0.089 Uiso 1 1 calc R . . 
H29B H 0.5193 0.9955 0.2880 0.089 Uiso 1 1 calc R . . 
C30 C 0.3938(6) 0.9754(6) 0.3798(5) 0.124(3) Uani 1 1 d . . . 
H30A H 0.3475 1.0638 0.3661 0.148 Uiso 1 1 calc R . . 
H30B H 0.4070 0.9762 0.4311 0.148 Uiso 1 1 calc R . . 
C31 C 0.3153(5) 0.8799(6) 0.3726(3) 0.0894(17) Uani 1 1 d . . . 
H31A H 0.2457 0.9170 0.3432 0.107 Uiso 1 1 calc R . . 
H31B H 0.2726 0.8518 0.4212 0.107 Uiso 1 1 calc R . . 
C32 C 0.4116(4) 0.7688(5) 0.3350(4) 0.0915(19) Uani 1 1 d . . . 
H32A H 0.4204 0.6909 0.3681 0.110 Uiso 1 1 calc R . . 
H32B H 0.3808 0.7471 0.2911 0.110 Uiso 1 1 calc R . . 

loop_ 
  _atom_site_aniso_label 
  _atom_site_aniso_U_11 
  _atom_site_aniso_U_22 
  _atom_site_aniso_U_33 
  _atom_site_aniso_U_23 
  _atom_site_aniso_U_13 
  _atom_site_aniso_U_12 
Li1 0.042(3) 0.047(4) 0.039(4) 0.005(3) -0.013(3) -0.013(3) 
Li2 0.033(3) 0.039(3) 0.042(4) -0.002(3) -0.005(3) -0.009(3) 
Li3 0.034(3) 0.041(3) 0.039(4) 0.001(3) -0.007(3) -0.012(3) 
Li4 0.036(3) 0.044(3) 0.037(4) -0.003(3) -0.007(3) -0.007(3) 
O1 0.0262(13) 0.0414(14) 0.0478(16) -0.0024(12) -0.0085(11) -0.0027(11) 
O2 0.0458(15) 0.0452(15) 0.0362(15) -0.0042(12) -0.0105(12) -0.0169(12) 
O3 0.0343(13) 0.0408(14) 0.0377(15) 0.0065(12) -0.0016(11) -0.0163(11) 
O4 0.0327(13) 0.0426(14) 0.0326(14) 0.0054(12) -0.0087(11) -0.0065(11) 
O5 0.0424(15) 0.0478(16) 0.0612(19) 0.0033(14) -0.0067(13) -0.0199(12) 
O6 0.0458(15) 0.0613(17) 0.0422(16) -0.0117(13) 0.0016(13) -0.0263(13) 
O7 0.0377(15) 0.0495(17) 0.071(2) -0.0170(15) 0.0037(14) -0.0058(12) 
C1 0.035(2) 0.056(2) 0.057(3) -0.008(2) -0.0122(19) -0.0015(19) 
C2 0.031(2) 0.043(2) 0.061(3) -0.005(2) -0.0166(19) -0.0015(17) 
C3 0.063(3) 0.076(4) 0.186(7) -0.030(4) -0.057(4) -0.015(3) 
C4 0.070(3) 0.098(4) 0.067(3) 0.014(3) -0.016(3) 0.010(3) 
C5 0.036(2) 0.070(3) 0.095(4) -0.009(3) -0.018(2) 0.001(2) 
C6 0.039(2) 0.039(2) 0.040(2) -0.0031(18) -0.0077(17) -0.0133(17) 
C7 0.048(2) 0.048(2) 0.034(2) -0.0020(18) -0.0091(18) -0.0206(18) 
C8 0.064(3) 0.064(3) 0.050(3) -0.017(2) -0.012(2) -0.021(2) 
C9 0.167(6) 0.054(3) 0.069(4) -0.005(3) -0.070(4) -0.001(3) 
C10 0.104(4) 0.178(6) 0.041(3) -0.013(3) 0.010(3) -0.099(4) 
C11 0.064(3) 0.113(4) 0.103(4) 0.063(4) -0.040(3) -0.057(3) 
C12 0.060(3) 0.056(3) 0.062(3) 0.024(2) -0.027(2) -0.033(2) 
C13 0.104(4) 0.113(4) 0.102(4) 0.060(4) -0.067(4) -0.064(4) 
C14 0.104(4) 0.152(6) 0.136(6) 0.096(5) -0.050(4) -0.094(4) 
C15 0.242(10) 0.073(4) 0.121(6) 0.009(4) 0.017(6) -0.027(5) 
C16 0.038(2) 0.059(3) 0.036(2) 0.010(2) -0.0109(18) -0.0076(18) 
C17 0.047(2) 0.075(3) 0.041(2) 0.005(2) -0.013(2) 0.006(2) 
C18 0.107(4) 0.088(4) 0.076(4) 0.007(3) -0.030(3) 0.040(3) 
C19 0.051(3) 0.153(6) 0.093(4) 0.010(4) -0.033(3) -0.032(3) 
C20 0.090(4) 0.151(6) 0.051(3) 0.022(3) -0.027(3) 0.022(4) 
C21 0.049(3) 0.080(3) 0.103(4) -0.013(3) -0.009(3) -0.029(2) 
C22 0.132(6) 0.101(5) 0.182(7) 0.039(5) -0.072(5) -0.086(5) 
C23 0.104(6) 0.057(4) 0.453(19) -0.001(7) -0.083(8) -0.029(4) 
C24 0.068(3) 0.054(3) 0.101(4) 0.016(3) -0.021(3) -0.016(2) 
C25 0.060(3) 0.096(4) 0.059(3) -0.005(3) -0.012(2) -0.046(3) 
C26 0.124(5) 0.173(7) 0.072(4) -0.013(4) -0.039(4) -0.079(5) 
C27 0.082(4) 0.326(12) 0.054(4) -0.053(5) -0.008(3) -0.061(6) 
C28 0.063(3) 0.070(3) 0.049(3) -0.013(2) 0.014(2) -0.022(2) 
C29 0.058(3) 0.060(3) 0.101(4) -0.029(3) 0.008(3) -0.014(2) 
C30 0.075(4) 0.075(4) 0.197(8) -0.049(5) 0.043(4) -0.010(3) 
C31 0.049(3) 0.109(4) 0.102(4) -0.012(4) 0.008(3) -0.017(3) 
C32 0.049(3) 0.067(3) 0.153(6) -0.021(4) 0.005(3) -0.016(3) 

_geom_special_details 
; 
  All esds (except the esd in the dihedral angle between two l.s. planes) 
  are estimated using the full covariance matrix.  The cell esds are taken 
  into account individually in the estimation of esds in distances, angles 
  and torsion angles; correlations between esds in cell parameters are only 
  used when they are defined by crystal symmetry.  An approximate (isotropic) 
  treatment of cell esds is used for estimating esds involving l.s. planes. 
; 

loop_ 
  _geom_bond_atom_site_label_1 
  _geom_bond_atom_site_label_2 
  _geom_bond_distance 
  _geom_bond_site_symmetry_2 
  _geom_bond_publ_flag 
Li1 O2 1.867(7) . ? 
Li1 O3 1.873(6) . ? 
Li1 O1 1.895(7) . ? 
Li2 O4 1.930(6) . ? 
Li2 O1 1.934(6) . ? 
Li2 O2 1.947(7) . ? 
Li2 O5 1.984(6) . ? 
Li3 O3 1.930(6) . ? 
Li3 O4 1.965(6) . ? 
Li3 O1 1.967(6) . ? 
Li3 O6 1.981(6) . ? 
Li4 O4 1.925(6) . ? 
Li4 O2 1.959(6) . ? 
Li4 O3 1.963(6) . ? 
Li4 O7 1.982(6) . ? 
O1 C1 1.377(4) . ? 
O2 C6 1.389(4) . ? 
O3 C11 1.371(5) . ? 
O4 C16 1.382(4) . ? 
O5 C21 1.412(5) . ? 
O5 C24 1.433(5) . ? 
O6 C28 1.435(5) . ? 
O6 C25 1.440(5) . ? 
O7 C32 1.409(5) . ? 
O7 C29 1.433(5) . ? 
C1 C2 1.529(5) . ? 
C2 C3 1.484(6) . ? 
C2 C5 1.515(5) . ? 
C2 C4 1.542(6) . ? 
C6 C7 1.516(5) . ? 
C7 C9 1.502(6) . ? 
C7 C8 1.520(5) . ? 
C7 C10 1.533(6) . ? 
C11 C12 1.456(6) . ? 
C12 C14 1.467(6) . ? 
C12 C13 1.480(6) . ? 
C12 C15 1.580(8) . ? 
C16 C17 1.524(5) . ? 
C17 C19 1.524(7) . ? 
C17 C18 1.529(7) . ? 
C17 C20 1.536(6) . ? 
C21 C22 1.498(7) . ? 
C22 C23 1.332(9) . ? 
C23 C24 1.474(8) . ? 
C25 C26 1.495(7) . ? 
C26 C27 1.422(8) . ? 
C27 C28 1.422(7) . ? 
C29 C30 1.414(7) . ? 
C30 C31 1.460(8) . ? 
C31 C32 1.482(7) . ? 

loop_ 
  _geom_angle_atom_site_label_1 
  _geom_angle_atom_site_label_2 
  _geom_angle_atom_site_label_3 
  _geom_angle 
  _geom_angle_site_symmetry_1 
  _geom_angle_site_symmetry_3 
  _geom_angle_publ_flag 
O2 Li1 O3 100.0(3) . . ? 
O2 Li1 O1 100.4(3) . . ? 
O3 Li1 O1 101.3(3) . . ? 
O4 Li2 O1 98.4(3) . . ? 
O4 Li2 O2 97.3(3) . . ? 
O1 Li2 O2 96.2(3) . . ? 
O4 Li2 O5 113.9(3) . . ? 
O1 Li2 O5 132.8(3) . . ? 
O2 Li2 O5 111.8(3) . . ? 
O3 Li3 O4 96.6(3) . . ? 
O3 Li3 O1 96.8(3) . . ? 
O4 Li3 O1 96.2(3) . . ? 
O3 Li3 O6 122.9(3) . . ? 
O4 Li3 O6 121.2(3) . . ? 
O1 Li3 O6 117.3(3) . . ? 
O4 Li4 O2 97.1(3) . . ? 
O4 Li4 O3 96.9(3) . . ? 
O2 Li4 O3 93.9(3) . . ? 
O4 Li4 O7 126.0(3) . . ? 
O2 Li4 O7 117.0(3) . . ? 
O3 Li4 O7 119.3(3) . . ? 
C1 O1 Li1 136.2(3) . . ? 
C1 O1 Li2 134.6(3) . . ? 
Li1 O1 Li2 80.6(3) . . ? 
C1 O1 Li3 123.1(3) . . ? 
Li1 O1 Li3 79.6(3) . . ? 
Li2 O1 Li3 82.1(2) . . ? 
C6 O2 Li1 134.8(3) . . ? 
C6 O2 Li2 122.8(3) . . ? 
Li1 O2 Li2 81.0(3) . . ? 
C6 O2 Li4 134.2(3) . . ? 
Li1 O2 Li4 82.3(3) . . ? 
Li2 O2 Li4 81.9(3) . . ? 
C11 O3 Li1 134.0(3) . . ? 
C11 O3 Li3 133.5(4) . . ? 
Li1 O3 Li3 81.1(3) . . ? 
C11 O3 Li4 124.4(3) . . ? 
Li1 O3 Li4 82.0(3) . . ? 
Li3 O3 Li4 82.9(3) . . ? 
C16 O4 Li4 149.7(3) . . ? 
C16 O4 Li2 119.7(3) . . ? 
Li4 O4 Li2 83.2(3) . . ? 
C16 O4 Li3 117.6(3) . . ? 
Li4 O4 Li3 83.0(3) . . ? 
Li2 O4 Li3 82.3(2) . . ? 
C21 O5 C24 108.4(3) . . ? 
C21 O5 Li2 127.5(3) . . ? 
C24 O5 Li2 114.9(3) . . ? 
C28 O6 C25 108.6(3) . . ? 
C28 O6 Li3 121.5(3) . . ? 
C25 O6 Li3 125.4(3) . . ? 
C32 O7 C29 108.3(3) . . ? 
C32 O7 Li4 127.6(3) . . ? 
C29 O7 Li4 123.9(3) . . ? 
O1 C1 C2 116.7(3) . . ? 
C3 C2 C5 111.9(4) . . ? 
C3 C2 C1 112.1(4) . . ? 
C5 C2 C1 110.0(3) . . ? 
C3 C2 C4 108.2(4) . . ? 
C5 C2 C4 107.0(4) . . ? 
C1 C2 C4 107.4(3) . . ? 
O2 C6 C7 115.8(3) . . ? 
C9 C7 C6 109.4(3) . . ? 
C9 C7 C8 107.9(3) . . ? 
C6 C7 C8 109.5(3) . . ? 
C9 C7 C10 109.8(4) . . ? 
C6 C7 C10 110.4(3) . . ? 
C8 C7 C10 109.6(4) . . ? 
O3 C11 C12 121.0(4) . . ? 
C11 C12 C14 116.1(4) . . ? 
C11 C12 C13 116.0(4) . . ? 
C14 C12 C13 114.7(4) . . ? 
C11 C12 C15 103.2(5) . . ? 
C14 C12 C15 102.4(5) . . ? 
C13 C12 C15 101.2(5) . . ? 
O4 C16 C17 115.6(3) . . ? 
C16 C17 C19 108.9(4) . . ? 
C16 C17 C18 109.3(4) . . ? 
C19 C17 C18 111.1(4) . . ? 
C16 C17 C20 108.1(4) . . ? 
C19 C17 C20 109.0(5) . . ? 
C18 C17 C20 110.4(4) . . ? 
O5 C21 C22 106.4(4) . . ? 
C23 C22 C21 107.6(5) . . ? 
C22 C23 C24 109.1(6) . . ? 
O5 C24 C23 105.6(4) . . ? 
O6 C25 C26 106.1(4) . . ? 
C27 C26 C25 105.9(4) . . ? 
C26 C27 C28 110.2(5) . . ? 
C27 C28 O6 106.2(4) . . ? 
C30 C29 O7 107.9(4) . . ? 
C29 C30 C31 107.8(5) . . ? 
C30 C31 C32 105.0(4) . . ? 
O7 C32 C31 108.0(4) . . ? 

_diffrn_measured_fraction_theta_max    0.988 
_diffrn_reflns_theta_full              23.35 
_diffrn_measured_fraction_theta_full   0.988 
_refine_diff_density_max    0.922 
_refine_diff_density_min   -0.359 
_refine_diff_density_rms    0.057 

#===END 

data_kp027s 

_audit_creation_method            SHELXL-97 
_chemical_name_systematic 
; 
  Lithium Neo-pentoxide pyridine 
; 
_chemical_name_common             Li4(ONep)4(Py)3 
_chemical_melting_point           ? 
_chemical_formula_moiety          ? 
_chemical_formula_sum 
  'C35 H59 Li4 N3 O4' 
_chemical_formula_weight          613.61 

loop_ 
  _atom_type_symbol 
  _atom_type_description 
  _atom_type_scat_dispersion_real 
  _atom_type_scat_dispersion_imag 
  _atom_type_scat_source 
  'C'  'C'   0.0033   0.0016 
  'International Tables Vol C Tables 4.2.6.8 and 6.1.1.4' 
  'H'  'H'   0.0000   0.0000 
  'International Tables Vol C Tables 4.2.6.8 and 6.1.1.4' 
  'Li'  'Li'  -0.0003   0.0001 
  'International Tables Vol C Tables 4.2.6.8 and 6.1.1.4' 
  'O'  'O'   0.0106   0.0060 
  'International Tables Vol C Tables 4.2.6.8 and 6.1.1.4' 
  'N'  'N'   0.0061   0.0033 
  'International Tables Vol C Tables 4.2.6.8 and 6.1.1.4' 

_symmetry_cell_setting            Triclinic 
_symmetry_space_group_name_H-M    P1 

loop_ 
  _symmetry_equiv_pos_as_xyz 
  'x, y, z' 

_cell_length_a                    10.552(4) 
_cell_length_b                    10.572(4) 
_cell_length_c                    10.724(4) 
_cell_angle_alpha                 105.271(5) 
_cell_angle_beta                  112.677(5) 
_cell_angle_gamma                 101.756(5) 
_cell_volume                      1000.3(6) 
_cell_formula_units_Z             1 
_cell_measurement_temperature     168(2) 
_cell_measurement_reflns_used     ? 
_cell_measurement_theta_min       ? 
_cell_measurement_theta_max       ? 

_exptl_crystal_description        block 
_exptl_crystal_colour             colorless 
_exptl_crystal_size_max           0.3 
_exptl_crystal_size_mid           0.34 
_exptl_crystal_size_min           0.4 
_exptl_crystal_density_meas       ? 
_exptl_crystal_density_diffrn     1.019 
_exptl_crystal_density_method     'not measured' 
_exptl_crystal_F_000              334 
_exptl_absorpt_coefficient_mu     0.064 
_exptl_absorpt_correction_type    SADABS 
_exptl_absorpt_correction_T_min   ? 
_exptl_absorpt_correction_T_max   ? 
_exptl_absorpt_process_details    ? 

_exptl_special_details 
; 
  ? 
; 

_diffrn_ambient_temperature       168(2) 
_diffrn_radiation_wavelength      0.71073 
_diffrn_radiation_type            MoK\a 
_diffrn_radiation_source          'fine-focus sealed tube' 
_diffrn_radiation_monochromator   graphite 
_diffrn_measurement_device_type   'CCD area detector' 
_diffrn_measurement_method        'phi and omega scans' 
_diffrn_detector_area_resol_mean  ? 
_diffrn_standards_number          ? 
_diffrn_standards_interval_count  ? 
_diffrn_standards_interval_time   ? 
_diffrn_standards_decay_%         ? 
_diffrn_reflns_number             4706 
_diffrn_reflns_av_R_equivalents   0.0317 
_diffrn_reflns_av_sigmaI/netI     0.0661 
_diffrn_reflns_limit_h_min        -8 
_diffrn_reflns_limit_h_max        11 
_diffrn_reflns_limit_k_min        -11 
_diffrn_reflns_limit_k_max        9 
_diffrn_reflns_limit_l_min        -11 
_diffrn_reflns_limit_l_max        11 
_diffrn_reflns_theta_min          2.13 
_diffrn_reflns_theta_max          23.34 
_reflns_number_total              3561 
_reflns_number_gt                 2387 
_reflns_threshold_expression      >2sigma(I) 

_computing_data_collection        'Bruker SMART' 
_computing_cell_refinement        'Bruker SMART' 
_computing_data_reduction         'Bruker SHELXTL' 
_computing_structure_solution     'SHELXS-97 (Sheldrick, 1990)' 
_computing_structure_refinement   'SHELXL-97 (Sheldrick, 1997)' 
_computing_molecular_graphics     'Bruker SHELXTL' 
_computing_publication_material   'Bruker SHELXTL' 

_refine_special_details 
; 
  Refinement of F^2^ against ALL reflections.  The weighted R-factor wR and 
  goodness of fit S are based on F^2^, conventional R-factors R are based 
  on F, with F set to zero for negative F^2^. The threshold expression of 
  F^2^ > 2sigma(F^2^) is used only for calculating R-factors(gt) etc. and is 
  not relevant to the choice of reflections for refinement.  R-factors based 
  on F^2^ are statistically about twice as large as those based on F, and R- 
  factors based on ALL data will be even larger. 
; 

_refine_ls_structure_factor_coef  Fsqd 
_refine_ls_matrix_type            full 
_refine_ls_weighting_scheme       calc 
_refine_ls_weighting_details 
  'calc w=1/[\s^2^(Fo^2^)+(0.1223P)^2^+0.0000P] where P=(Fo^2^+2Fc^2^)/3' 
_atom_sites_solution_primary      direct 
_atom_sites_solution_secondary    difmap 
_atom_sites_solution_hydrogens    geom 
_refine_ls_hydrogen_treatment     mixed 
_refine_ls_extinction_method      none 
_refine_ls_extinction_coef        ? 
_refine_ls_abs_structure_details 
  'Flack H D (1983), Acta Cryst. A39, 876-881' 
_refine_ls_abs_structure_Flack    3(2) 
_refine_ls_number_reflns          3561 
_refine_ls_number_parameters      427 
_refine_ls_number_restraints      3 
_refine_ls_R_factor_all           0.0989 
_refine_ls_R_factor_gt            0.0672 
_refine_ls_wR_factor_ref          0.1879 
_refine_ls_wR_factor_gt           0.1663 
_refine_ls_goodness_of_fit_ref    0.957 
_refine_ls_restrained_S_all       0.956 
_refine_ls_shift/su_max           0.029 
_refine_ls_shift/su_mean          0.002 

loop_ 
  _atom_site_label 
  _atom_site_type_symbol 
  _atom_site_fract_x 
  _atom_site_fract_y 
  _atom_site_fract_z 
  _atom_site_U_iso_or_equiv 
  _atom_site_adp_type 
  _atom_site_occupancy 
  _atom_site_symmetry_multiplicity 
  _atom_site_calc_flag 
  _atom_site_refinement_flags 
  _atom_site_disorder_assembly 
  _atom_site_disorder_group 
Li1 Li 0.6546(12) -0.0678(10) -0.0642(12) 0.056(3) Uani 1 1 d . . . 
Li2 Li 0.8947(12) -0.0216(10) 0.1384(11) 0.051(3) Uani 1 1 d . . . 
Li3 Li 0.8532(12) 0.1529(10) 0.0122(11) 0.053(3) Uani 1 1 d . . . 
Li4 Li 0.7346(12) 0.1196(10) 0.1741(11) 0.053(3) Uani 1 1 d . . . 
N1 N 1.0785(6) -0.0782(5) 0.2215(6) 0.0533(14) Uani 1 1 d . . . 
N2 N 0.9277(6) 0.2982(5) -0.0622(6) 0.0557(14) Uani 1 1 d . . . 
N3 N 0.6784(6) 0.2118(5) 0.3318(6) 0.0530(14) Uani 1 1 d . . . 
O1 O 0.8312(4) -0.0410(4) -0.0684(4) 0.0493(11) Uani 1 1 d . . . 
O2 O 0.7024(5) -0.0824(4) 0.1178(5) 0.0535(11) Uani 1 1 d . . . 
O3 O 0.6480(4) 0.1140(4) -0.0190(4) 0.0500(10) Uani 1 1 d . . . 
O4 O 0.9368(4) 0.1768(4) 0.2146(4) 0.0519(11) Uani 1 1 d . . . 
C1 C 0.8864(7) -0.1176(6) -0.1459(7) 0.0530(17) Uani 1 1 d . . . 
H1A H 0.9023 -0.1936 -0.1109 0.064 Uiso 1 1 calc R . . 
H1B H 0.9828 -0.0563 -0.1244 0.064 Uiso 1 1 calc R . . 
C2 C 0.7905(7) -0.1813(6) -0.3101(6) 0.0462(15) Uani 1 1 d . . . 
C3 C 0.7739(12) -0.0669(8) -0.3686(9) 0.097(3) Uani 1 1 d . . . 
H3A H 0.7054 -0.1086 -0.4732 0.146 Uiso 1 1 calc R . . 
H3B H 0.8693 -0.0120 -0.3532 0.146 Uiso 1 1 calc R . . 
H3C H 0.7364 -0.0060 -0.3172 0.146 Uiso 1 1 calc R . . 
C4 C 0.6422(9) -0.2722(8) -0.3503(9) 0.081(2) Uani 1 1 d . . . 
H4A H 0.6506 -0.3442 -0.3088 0.121 Uiso 1 1 calc R . . 
H4B H 0.5853 -0.3167 -0.4568 0.121 Uiso 1 1 calc R . . 
H4C H 0.5930 -0.2157 -0.3117 0.121 Uiso 1 1 calc R . . 
C5 C 0.8641(10) -0.2693(8) -0.3781(9) 0.080(2) Uani 1 1 d . . . 
H5A H 0.8612 -0.3508 -0.3506 0.120 Uiso 1 1 calc R . . 
H5B H 0.9660 -0.2126 -0.3422 0.120 Uiso 1 1 calc R . . 
H5C H 0.8119 -0.3004 -0.4846 0.120 Uiso 1 1 calc R . . 
C6 C 0.6361(11) -0.1637(7) 0.1719(10) 0.083(3) Uani 1 1 d . . . 
H6A H 0.5535 -0.1349 0.1750 0.100 Uiso 1 1 calc R . . 
H6B H 0.7074 -0.1428 0.2738 0.100 Uiso 1 1 calc R . . 
C7 C 0.5789(7) -0.3198(6) 0.0901(7) 0.0524(17) Uani 1 1 d . . . 
C8 C 0.4659(13) -0.3567(13) -0.0657(11) 0.151(6) Uani 1 1 d . . . 
H8A H 0.5089 -0.3052 -0.1118 0.227 Uiso 1 1 calc R . . 
H8B H 0.3815 -0.3316 -0.0657 0.227 Uiso 1 1 calc R . . 
H8C H 0.4344 -0.4572 -0.1203 0.227 Uiso 1 1 calc R . . 
C9 C 0.7021(14) -0.3643(9) 0.098(2) 0.209(9) Uani 1 1 d . . . 
H9A H 0.7897 -0.3017 0.1895 0.314 Uiso 1 1 calc R . . 
H9B H 0.7187 -0.3616 0.0151 0.314 Uiso 1 1 calc R . . 
H9C H 0.6813 -0.4598 0.0961 0.314 Uiso 1 1 calc R . . 
C10 C 0.5015(12) -0.3939(8) 0.1569(10) 0.103(3) Uani 1 1 d . . . 
H10A H 0.4746 -0.4950 0.1093 0.155 Uiso 1 1 calc R . . 
H10B H 0.4130 -0.3706 0.1434 0.155 Uiso 1 1 calc R . . 
H10C H 0.5666 -0.3641 0.2615 0.155 Uiso 1 1 calc R . . 
C11 C 0.5553(7) 0.1643(7) -0.1092(8) 0.0610(18) Uani 1 1 d . . . 
H11A H 0.5814 0.1652 -0.1884 0.073 Uiso 1 1 calc R . . 
H11B H 0.5735 0.2622 -0.0516 0.073 Uiso 1 1 calc R . . 
C12 C 0.3928(7) 0.0835(7) -0.1782(7) 0.0562(18) Uani 1 1 d . . . 
C13 C 0.3097(10) 0.1437(10) -0.2819(11) 0.107(3) Uani 1 1 d . . . 
H13A H 0.2046 0.0935 -0.3253 0.161 Uiso 1 1 calc R . . 
H13B H 0.3390 0.1342 -0.3592 0.161 Uiso 1 1 calc R . . 
H13C H 0.3313 0.2427 -0.2287 0.161 Uiso 1 1 calc R . . 
C14 C 0.3434(9) 0.0891(10) -0.0660(10) 0.097(3) Uani 1 1 d . . . 
H14A H 0.4033 0.0563 0.0052 0.145 Uiso 1 1 calc R . . 
H14B H 0.2407 0.0294 -0.1125 0.145 Uiso 1 1 calc R . . 
H14C H 0.3535 0.1855 -0.0161 0.145 Uiso 1 1 calc R . . 
C15 C 0.3635(9) -0.0695(8) -0.2659(10) 0.095(3) Uani 1 1 d . . . 
H15A H 0.4073 -0.1137 -0.1987 0.143 Uiso 1 1 calc R . . 
H15B H 0.4066 -0.0729 -0.3324 0.143 Uiso 1 1 calc R . . 
H15C H 0.2577 -0.1194 -0.3225 0.143 Uiso 1 1 calc R . . 
C16 C 1.0464(13) 0.2551(10) 0.3487(15) 0.188(8) Uani 1 1 d . . . 
H16A H 1.1272 0.2178 0.3597 0.226 Uiso 1 1 calc R . . 
H16B H 1.0122 0.2359 0.4181 0.226 Uiso 1 1 calc R . . 
C17 C 1.1104(7) 0.4040(6) 0.4003(7) 0.0538(17) Uani 1 1 d . . . 
C18 C 0.9993(9) 0.4754(7) 0.3523(9) 0.073(2) Uani 1 1 d . . . 
H18A H 0.9176 0.4130 0.2566 0.110 Uiso 1 1 calc R . . 
H18B H 1.0459 0.5617 0.3454 0.110 Uiso 1 1 calc R . . 
H18C H 0.9628 0.4974 0.4238 0.110 Uiso 1 1 calc R . . 
C19 C 1.2308(15) 0.4773(13) 0.5460(17) 0.224(10) Uani 1 1 d . . . 
H19A H 1.1927 0.4973 0.6164 0.335 Uiso 1 1 calc R . . 
H19B H 1.2902 0.5651 0.5519 0.335 Uiso 1 1 calc R . . 
H19C H 1.2912 0.4192 0.5686 0.335 Uiso 1 1 calc R . . 
C20 C 1.1994(13) 0.4069(12) 0.3096(14) 0.129(4) Uani 1 1 d . . . 
H20A H 1.2694 0.3584 0.3372 0.193 Uiso 1 1 calc R . . 
H20B H 1.2523 0.5039 0.3310 0.193 Uiso 1 1 calc R . . 
H20C H 1.1314 0.3602 0.2050 0.193 Uiso 1 1 calc R . . 
C21 C 1.1839(8) -0.0105(7) 0.2012(8) 0.066(2) Uani 1 1 d . . . 
H21 H 1.1654 0.0513 0.1516 0.079 Uiso 1 1 calc R . . 
C22 C 1.3157(8) -0.0249(10) 0.2471(9) 0.084(3) Uani 1 1 d . . . 
H22 H 1.3886 0.0282 0.2319 0.101 Uiso 1 1 calc R . . 
C23 C 1.3456(8) -0.1142(9) 0.3147(9) 0.073(2) Uani 1 1 d . . . 
H23 H 1.4380 -0.1264 0.3464 0.087 Uiso 1 1 calc R . . 
C24 C 1.2386(9) -0.1856(7) 0.3357(9) 0.073(2) Uani 1 1 d . . . 
H24 H 1.2535 -0.2508 0.3813 0.088 Uiso 1 1 calc R . . 
C25 C 1.1082(7) -0.1619(7) 0.2898(8) 0.0630(19) Uani 1 1 d . . . 
H25 H 1.0353 -0.2094 0.3088 0.076 Uiso 1 1 calc R . . 
C26 C 0.8905(8) 0.4124(7) -0.0480(7) 0.0541(17) Uani 1 1 d . . . 
H26 H 0.8188 0.4185 -0.0160 0.065 Uiso 1 1 calc R . . 
C27 C 0.9508(9) 0.5216(8) -0.0776(9) 0.073(2) Uani 1 1 d . . . 
H27 H 0.9231 0.6023 -0.0643 0.088 Uiso 1 1 calc R . . 
C28 C 1.0494(10) 0.5115(10) -0.1255(11) 0.092(3) Uani 1 1 d . . . 
H28 H 1.0911 0.5849 -0.1484 0.110 Uiso 1 1 calc R . . 
C29 C 1.0908(9) 0.3955(9) -0.1417(10) 0.083(3) Uani 1 1 d . . . 
H29 H 1.1623 0.3881 -0.1736 0.099 Uiso 1 1 calc R . . 
C30 C 1.0266(8) 0.2929(7) -0.1109(8) 0.0617(18) Uani 1 1 d . . . 
H30 H 1.0530 0.2115 -0.1246 0.074 Uiso 1 1 calc R . . 
C31 C 0.7027(7) 0.1790(7) 0.4482(7) 0.0530(16) Uani 1 1 d . . . 
H31 H 0.7506 0.1128 0.4601 0.064 Uiso 1 1 calc R . . 
C32 C 0.6642(9) 0.2328(7) 0.5502(8) 0.068(2) Uani 1 1 d . . . 
H32 H 0.6847 0.2064 0.6320 0.081 Uiso 1 1 calc R . . 
C33 C 0.5937(11) 0.3280(8) 0.5321(10) 0.088(3) Uani 1 1 d . . . 
H33 H 0.5635 0.3680 0.6012 0.105 Uiso 1 1 calc R . . 
C34 C 0.5681(10) 0.3635(8) 0.4151(10) 0.085(3) Uani 1 1 d . . . 
H34 H 0.5204 0.4294 0.4005 0.102 Uiso 1 1 calc R . . 
C35 C 0.6126(8) 0.3023(7) 0.3178(8) 0.065(2) Uani 1 1 d . . . 
H35 H 0.5942 0.3275 0.2354 0.078 Uiso 1 1 calc R . . 

loop_ 
  _atom_site_aniso_label 
  _atom_site_aniso_U_11 
  _atom_site_aniso_U_22 
  _atom_site_aniso_U_33 
  _atom_site_aniso_U_23 
  _atom_site_aniso_U_13 
  _atom_site_aniso_U_12 
Li1 0.051(7) 0.051(6) 0.068(7) 0.020(5) 0.029(6) 0.019(5) 
Li2 0.053(6) 0.048(6) 0.038(6) 0.014(5) 0.011(5) 0.014(5) 
Li3 0.052(7) 0.049(6) 0.052(7) 0.011(5) 0.022(6) 0.015(5) 
Li4 0.053(6) 0.048(6) 0.049(6) 0.010(5) 0.024(6) 0.015(5) 
N1 0.051(3) 0.047(3) 0.058(4) 0.018(3) 0.023(3) 0.015(3) 
N2 0.063(4) 0.046(3) 0.048(3) 0.011(3) 0.025(3) 0.011(3) 
N3 0.056(4) 0.046(3) 0.055(4) 0.016(3) 0.027(3) 0.016(3) 
O1 0.057(3) 0.045(2) 0.045(2) 0.0122(19) 0.026(2) 0.018(2) 
O2 0.066(3) 0.045(2) 0.060(3) 0.025(2) 0.036(3) 0.018(2) 
O3 0.047(2) 0.052(2) 0.049(3) 0.020(2) 0.017(2) 0.023(2) 
O4 0.043(3) 0.042(2) 0.044(3) 0.000(2) 0.010(2) 0.004(2) 
C1 0.064(5) 0.052(4) 0.045(4) 0.010(3) 0.030(4) 0.026(4) 
C2 0.053(4) 0.037(3) 0.039(4) 0.010(3) 0.018(3) 0.011(3) 
C3 0.159(9) 0.070(5) 0.053(5) 0.027(4) 0.041(6) 0.034(6) 
C4 0.083(6) 0.060(4) 0.060(5) -0.012(4) 0.027(4) 0.007(4) 
C5 0.096(6) 0.079(5) 0.057(5) 0.005(4) 0.040(5) 0.035(5) 
C6 0.136(8) 0.044(4) 0.088(6) 0.021(4) 0.075(6) 0.023(4) 
C7 0.048(4) 0.043(4) 0.056(4) 0.013(3) 0.021(4) 0.011(3) 
C8 0.127(9) 0.147(9) 0.083(7) 0.054(7) 0.003(7) -0.061(8) 
C9 0.114(9) 0.047(5) 0.47(3) 0.054(9) 0.163(14) 0.036(6) 
C10 0.149(9) 0.063(5) 0.075(6) 0.029(5) 0.048(6) -0.001(5) 
C11 0.058(5) 0.064(4) 0.060(5) 0.023(4) 0.024(4) 0.027(4) 
C12 0.051(4) 0.065(4) 0.050(4) 0.021(4) 0.018(4) 0.028(4) 
C13 0.076(6) 0.111(7) 0.123(8) 0.062(6) 0.018(6) 0.044(6) 
C14 0.057(5) 0.127(7) 0.076(6) 0.013(5) 0.029(5) 0.010(5) 
C15 0.058(5) 0.086(6) 0.086(6) 0.003(5) 0.006(5) 0.014(5) 
C16 0.103(8) 0.082(7) 0.169(12) -0.052(7) -0.079(8) 0.044(6) 
C17 0.046(4) 0.045(4) 0.053(4) 0.018(3) 0.014(3) 0.002(3) 
C18 0.074(5) 0.052(4) 0.088(6) 0.013(4) 0.039(5) 0.021(4) 
C19 0.124(11) 0.133(10) 0.178(14) -0.075(10) -0.075(10) 0.059(9) 
C20 0.103(8) 0.134(8) 0.144(10) 0.047(8) 0.066(8) 0.023(7) 
C21 0.061(5) 0.051(4) 0.076(5) 0.032(4) 0.024(4) 0.003(4) 
C22 0.040(5) 0.122(7) 0.076(6) 0.047(6) 0.016(4) 0.011(5) 
C23 0.056(5) 0.093(6) 0.070(5) 0.031(5) 0.025(4) 0.035(5) 
C24 0.072(6) 0.056(4) 0.088(6) 0.041(4) 0.024(5) 0.024(4) 
C25 0.045(4) 0.071(5) 0.070(5) 0.041(4) 0.020(4) 0.010(4) 
C26 0.066(5) 0.051(4) 0.046(4) 0.018(3) 0.025(4) 0.025(4) 
C27 0.082(6) 0.055(4) 0.080(5) 0.028(4) 0.029(5) 0.030(4) 
C28 0.089(7) 0.088(6) 0.128(8) 0.068(6) 0.063(7) 0.029(6) 
C29 0.057(5) 0.097(6) 0.119(7) 0.064(6) 0.052(5) 0.021(5) 
C30 0.062(5) 0.066(4) 0.062(5) 0.020(4) 0.033(4) 0.026(4) 
C31 0.058(4) 0.054(4) 0.052(4) 0.021(3) 0.028(4) 0.023(3) 
C32 0.081(5) 0.065(5) 0.052(5) 0.017(4) 0.030(4) 0.023(4) 
C33 0.117(7) 0.076(5) 0.081(6) 0.007(5) 0.070(6) 0.035(6) 
C34 0.113(7) 0.070(5) 0.082(6) 0.021(5) 0.048(6) 0.056(5) 
C35 0.081(5) 0.048(4) 0.070(5) 0.023(4) 0.036(5) 0.028(4) 

_geom_special_details 
; 
  All esds (except the esd in the dihedral angle between two l.s. planes) 
  are estimated using the full covariance matrix.  The cell esds are taken 
  into account individually in the estimation of esds in distances, angles 
  and torsion angles; correlations between esds in cell parameters are only 
  used when they are defined by crystal symmetry.  An approximate (isotropic) 
  treatment of cell esds is used for estimating esds involving l.s. planes. 
; 

loop_ 
  _geom_bond_atom_site_label_1 
  _geom_bond_atom_site_label_2 
  _geom_bond_distance 
  _geom_bond_site_symmetry_2 
  _geom_bond_publ_flag 
Li1 O1 1.847(11) . ? 
Li1 O2 1.875(12) . ? 
Li1 O3 1.877(11) . ? 
Li2 O2 1.905(12) . ? 
Li2 O4 1.924(10) . ? 
Li2 O1 1.992(11) . ? 
Li2 N1 2.082(12) . ? 
Li3 O4 1.923(11) . ? 
Li3 O1 1.930(10) . ? 
Li3 O3 1.994(11) . ? 
Li3 N2 2.062(11) . ? 
Li4 O3 1.893(11) . ? 
Li4 O4 1.931(11) . ? 
Li4 O2 1.976(10) . ? 
Li4 N3 2.073(11) . ? 
N1 C25 1.302(8) . ? 
N1 C21 1.319(8) . ? 
N2 C26 1.333(8) . ? 
N2 C30 1.340(8) . ? 
N3 C35 1.299(8) . ? 
N3 C31 1.328(8) . ? 
O1 C1 1.376(7) . ? 
O2 C6 1.377(7) . ? 
O3 C11 1.389(7) . ? 
O4 C16 1.339(10) . ? 
C1 C2 1.517(8) . ? 
C2 C4 1.485(10) . ? 
C2 C3 1.513(10) . ? 
C2 C5 1.541(9) . ? 
C6 C7 1.510(9) . ? 
C7 C9 1.451(12) . ? 
C7 C10 1.510(10) . ? 
C7 C8 1.514(12) . ? 
C11 C12 1.520(9) . ? 
C12 C14 1.477(10) . ? 
C12 C13 1.503(10) . ? 
C12 C15 1.538(10) . ? 
C16 C17 1.436(12) . ? 
C17 C19 1.444(13) . ? 
C17 C18 1.519(10) . ? 
C17 C20 1.594(12) . ? 
C21 C22 1.341(10) . ? 
C22 C23 1.350(11) . ? 
C23 C24 1.354(10) . ? 
C24 C25 1.371(10) . ? 
C26 C27 1.374(10) . ? 
C27 C28 1.336(11) . ? 
C28 C29 1.375(11) . ? 
C29 C30 1.344(9) . ? 
C31 C32 1.339(9) . ? 
C32 C33 1.378(11) . ? 
C33 C34 1.348(12) . ? 
C34 C35 1.367(10) . ? 

loop_ 
  _geom_angle_atom_site_label_1 
  _geom_angle_atom_site_label_2 
  _geom_angle_atom_site_label_3 
  _geom_angle 
  _geom_angle_site_symmetry_1 
  _geom_angle_site_symmetry_3 
  _geom_angle_publ_flag 
O1 Li1 O2 101.7(6) . . ? 
O1 Li1 O3 101.6(5) . . ? 
O2 Li1 O3 99.7(5) . . ? 
O2 Li2 O4 98.9(5) . . ? 
O2 Li2 O1 95.6(5) . . ? 
O4 Li2 O1 95.6(5) . . ? 
O2 Li2 N1 134.2(6) . . ? 
O4 Li2 N1 113.0(5) . . ? 
O1 Li2 N1 112.2(5) . . ? 
O4 Li3 O1 97.8(5) . . ? 
O4 Li3 O3 95.6(5) . . ? 
O1 Li3 O3 94.7(4) . . ? 
O4 Li3 N2 123.3(5) . . ? 
O1 Li3 N2 122.4(5) . . ? 
O3 Li3 N2 116.6(5) . . ? 
O3 Li4 O4 98.7(5) . . ? 
O3 Li4 O2 95.7(5) . . ? 
O4 Li4 O2 96.2(5) . . ? 
O3 Li4 N3 123.5(6) . . ? 
O4 Li4 N3 119.4(5) . . ? 
O2 Li4 N3 117.7(5) . . ? 
C25 N1 C21 116.5(6) . . ? 
C25 N1 Li2 132.9(5) . . ? 
C21 N1 Li2 110.6(5) . . ? 
C26 N2 C30 116.3(6) . . ? 
C26 N2 Li3 120.1(5) . . ? 
C30 N2 Li3 123.2(5) . . ? 
C35 N3 C31 116.7(6) . . ? 
C35 N3 Li4 120.7(6) . . ? 
C31 N3 Li4 122.5(5) . . ? 
C1 O1 Li1 135.9(5) . . ? 
C1 O1 Li3 136.8(5) . . ? 
Li1 O1 Li3 82.3(5) . . ? 
C1 O1 Li2 118.3(5) . . ? 
Li1 O1 Li2 79.8(5) . . ? 
Li3 O1 Li2 81.9(4) . . ? 
C6 O2 Li1 136.0(6) . . ? 
C6 O2 Li2 134.5(6) . . ? 
Li1 O2 Li2 81.4(5) . . ? 
C6 O2 Li4 122.5(5) . . ? 
Li1 O2 Li4 80.2(4) . . ? 
Li2 O2 Li4 81.8(4) . . ? 
C11 O3 Li1 127.6(5) . . ? 
C11 O3 Li4 143.2(5) . . ? 
Li1 O3 Li4 82.3(5) . . ? 
C11 O3 Li3 120.0(5) . . ? 
Li1 O3 Li3 79.9(4) . . ? 
Li4 O3 Li3 82.1(5) . . ? 
C16 O4 Li3 145.3(9) . . ? 
C16 O4 Li2 119.6(6) . . ? 
Li3 O4 Li2 83.9(4) . . ? 
C16 O4 Li4 122.5(8) . . ? 
Li3 O4 Li4 83.0(5) . . ? 
Li2 O4 Li4 82.5(4) . . ? 
O1 C1 C2 114.9(5) . . ? 
C4 C2 C3 108.1(7) . . ? 
C4 C2 C1 111.5(5) . . ? 
C3 C2 C1 109.8(5) . . ? 
C4 C2 C5 109.2(5) . . ? 
C3 C2 C5 110.3(6) . . ? 
C1 C2 C5 108.0(5) . . ? 
O2 C6 C7 117.0(6) . . ? 
C9 C7 C6 108.1(7) . . ? 
C9 C7 C10 109.3(9) . . ? 
C6 C7 C10 110.7(6) . . ? 
C9 C7 C8 112.6(11) . . ? 
C6 C7 C8 109.7(7) . . ? 
C10 C7 C8 106.3(7) . . ? 
O3 C11 C12 115.9(5) . . ? 
C14 C12 C13 110.2(7) . . ? 
C14 C12 C11 111.2(6) . . ? 
C13 C12 C11 108.9(6) . . ? 
C14 C12 C15 109.3(6) . . ? 
C13 C12 C15 108.4(7) . . ? 
C11 C12 C15 108.8(6) . . ? 
O4 C16 C17 123.4(10) . . ? 
C16 C17 C19 118.5(9) . . ? 
C16 C17 C18 113.6(6) . . ? 
C19 C17 C18 116.2(7) . . ? 
C16 C17 C20 97.3(9) . . ? 
C19 C17 C20 99.0(10) . . ? 
C18 C17 C20 108.5(7) . . ? 
N1 C21 C22 123.1(7) . . ? 
C21 C22 C23 120.5(7) . . ? 
C22 C23 C24 117.3(7) . . ? 
C23 C24 C25 118.7(7) . . ? 
N1 C25 C24 123.8(6) . . ? 
N2 C26 C27 123.2(6) . . ? 
C28 C27 C26 118.3(7) . . ? 
C27 C28 C29 120.4(7) . . ? 
C30 C29 C28 117.7(7) . . ? 
N2 C30 C29 124.1(7) . . ? 
N3 C31 C32 124.4(6) . . ? 
C31 C32 C33 117.6(7) . . ? 
C34 C33 C32 119.2(7) . . ? 
C33 C34 C35 118.4(7) . . ? 
N3 C35 C34 123.7(7) . . ? 

_diffrn_measured_fraction_theta_max    0.981 
_diffrn_reflns_theta_full              23.34 
_diffrn_measured_fraction_theta_full   0.981 
_refine_diff_density_max    0.622 
_refine_diff_density_min   -0.310 
_refine_diff_density_rms    0.048 

#===END 
